# Supplementary material
Source: PubMed Central journal article supplement (PMC4194112)
Supplement: embj0033-0878-sd1.pdf [file embj0033-0878-sd1.pdf]

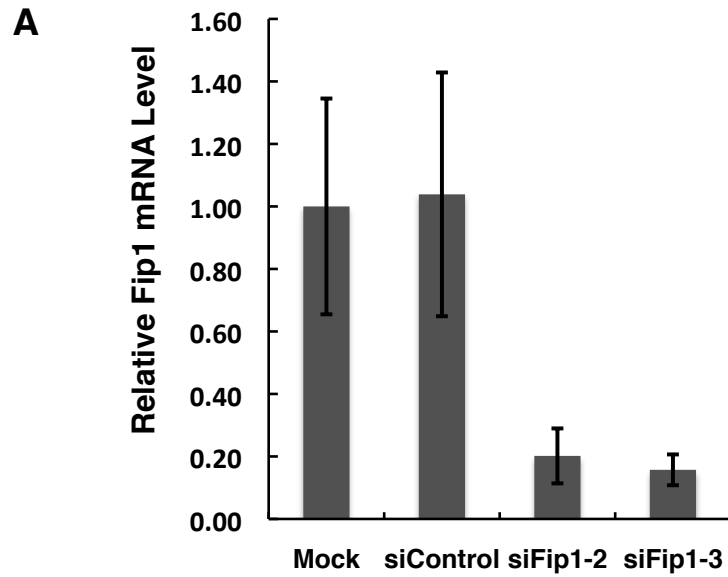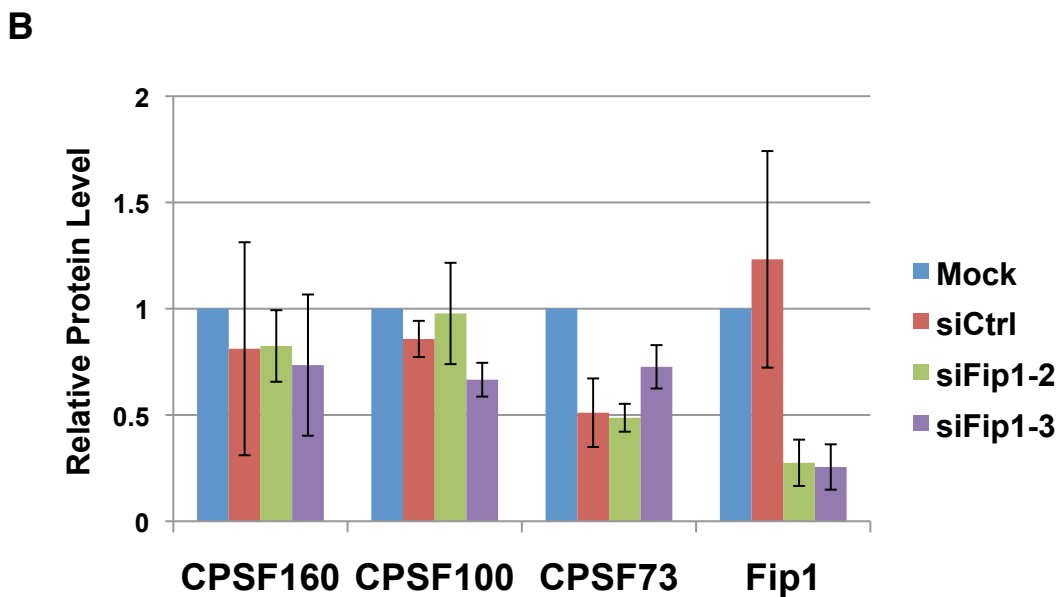

**Figure S1. Quantification of Fip1 mRNA and proteins in Fip1 KD samples. (A)** RT-qPCR analyses of Fip1 mRNA levels in the specified samples four days post-transfection. Fip1 levels are normalized to mock and plotted as mean  $\pm$  standard error of the mean (SEM) (n=4). **(B)** Quantification of western blotting signals as shown in main Figure 1(A). The ratio of specified protein and GAPDH (loading control) for all samples are normalized to mock and plotted as mean  $\pm$  SEM. (n=3).
