# Supplementary material
Source: PubMed Central journal article supplement (PMC4194112)
Supplement: embj0033-0878-sd2.pdf [file embj0033-0878-sd2.pdf]

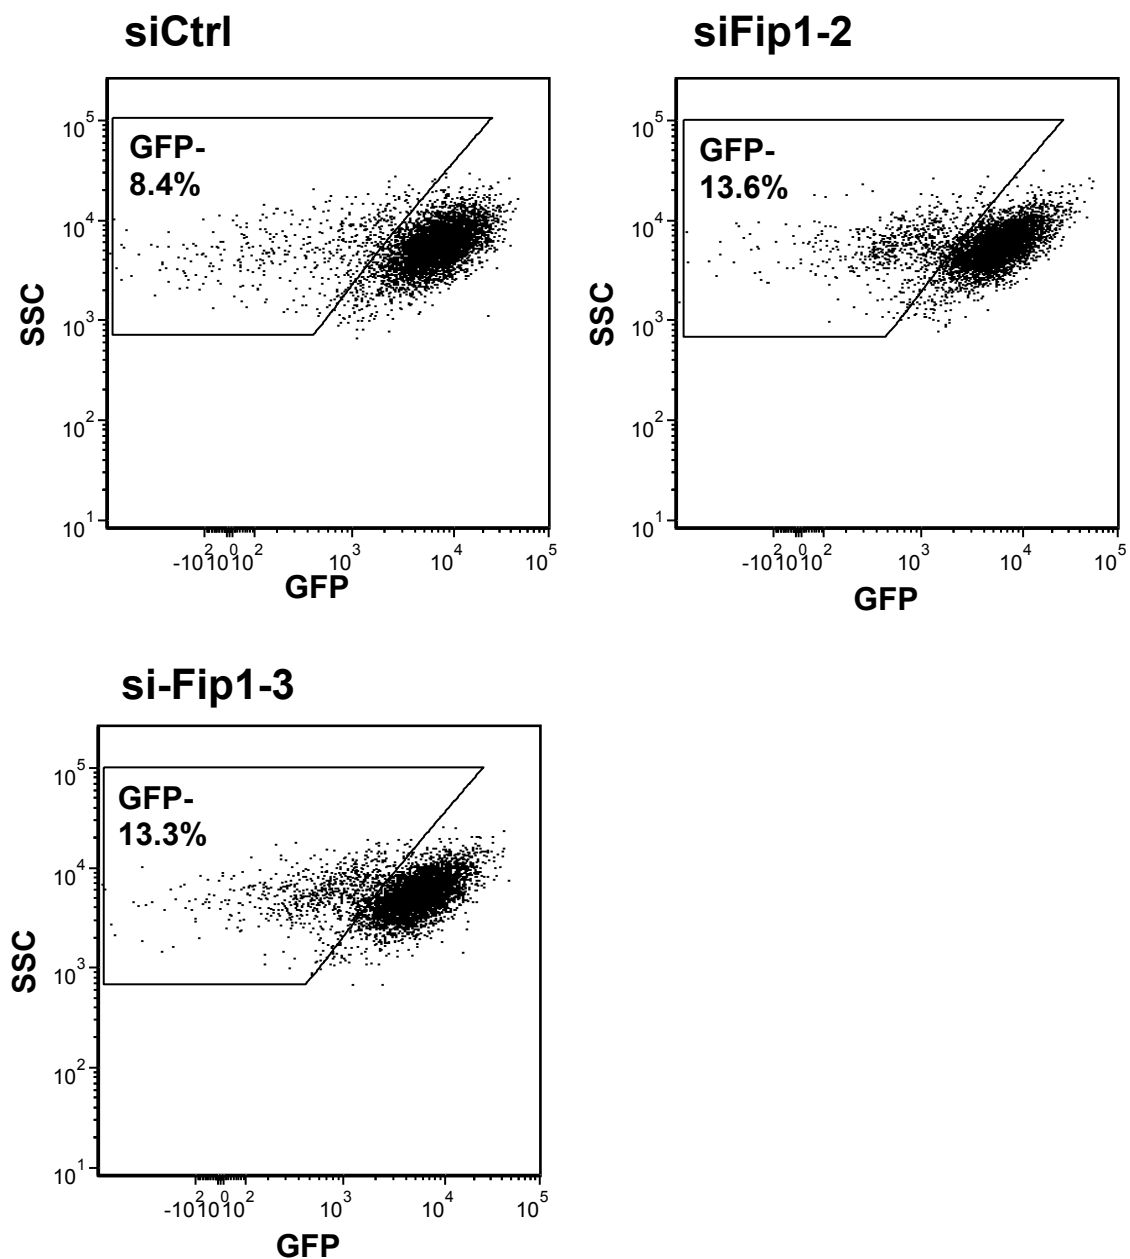

**Figure S2. Representative FACS plots of the Oct4GiP reporter assay.** Oct4GiP ESCs were transfected with the indicated siRNAs and % GFP- cells (gated on the plots) were determined by FACS 96 hrs after transfection.
