# Supplementary material
Source: PubMed Central journal article supplement (PMC4194112)
Supplement: embj0033-0878-sd3.pdf [file embj0033-0878-sd3.pdf]

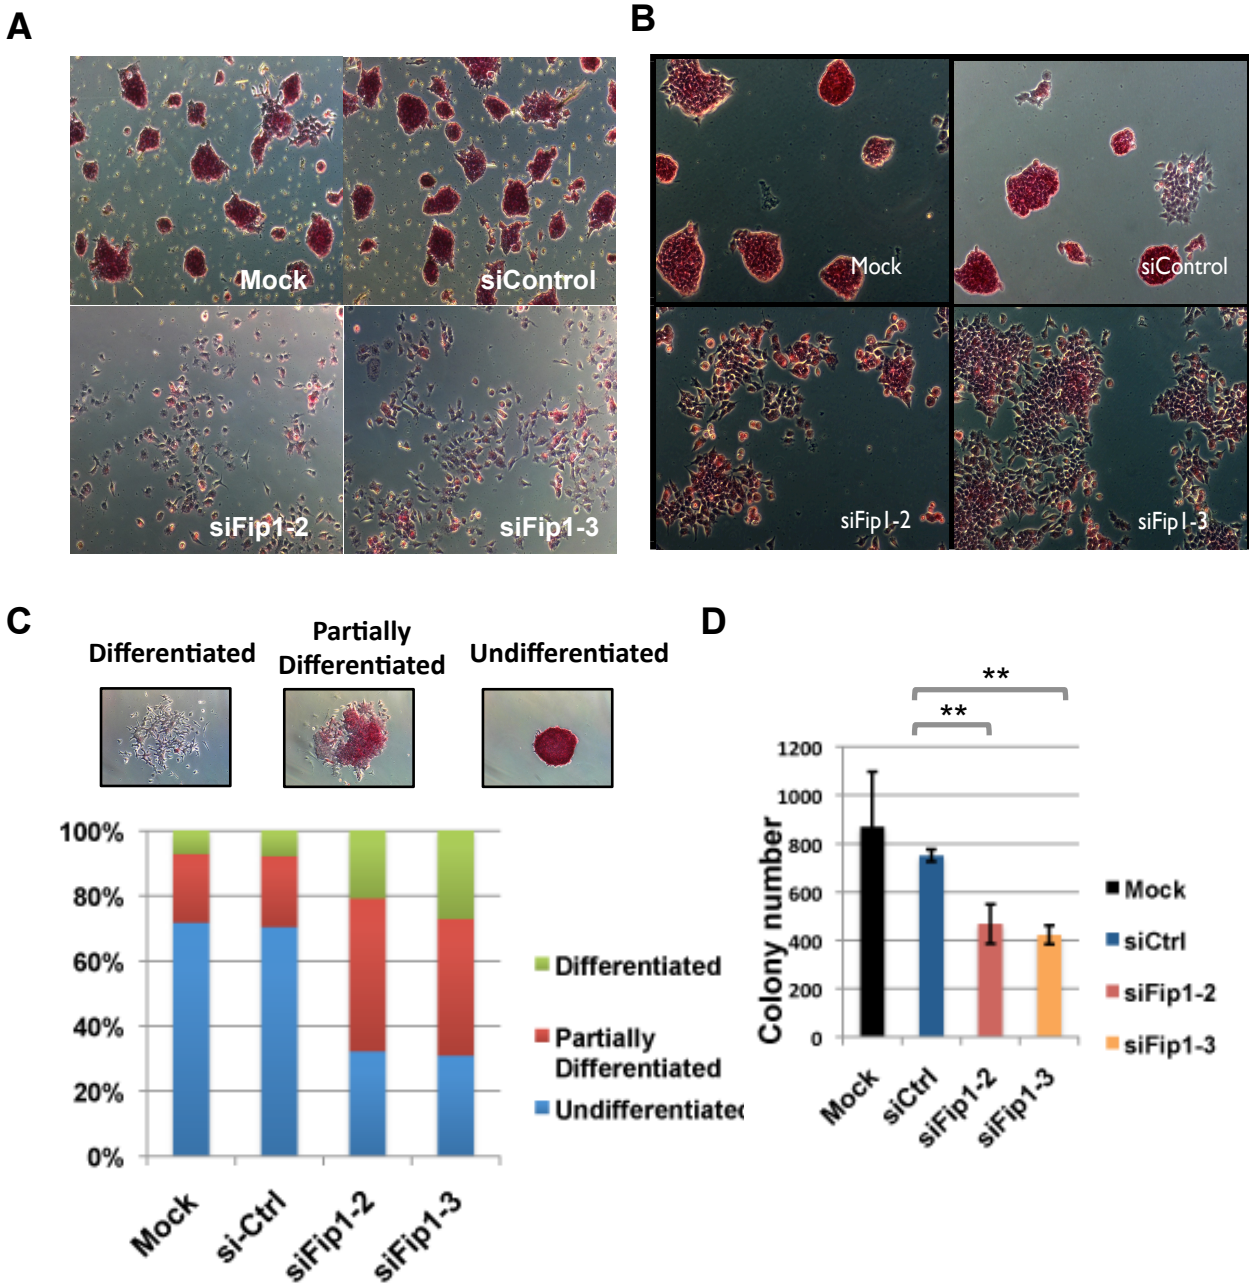

**Figure S3. Fip1 depletion in J1 cells results in loss of self-renewal. (A)** AP staining of E14 cell six days after transfection with each siRNA. **(B)** AP staining of J1 cells performed four days post-transfection with each siRNA. **(C)** Colony formation assay. ESCs were transfected with the indicated siRNAs and plated for colony formation. Colonies were stained with AP staining kit and counted. Representative images of undifferentiated, partially differentiated, and differentiated colonies are shown on the left. **(D)** One day after transfection with each siRNA, E14 cells were plated at colony density and the colony numbers (per 10,000 plated cells) were counted seven days after transfection. \*\*:  $p < 0.01$ .
