# Supplementary material
Source: PubMed Central journal article supplement (PMC4194112)
Supplement: embj0033-0878-sd4.pdf [file embj0033-0878-sd4.pdf]

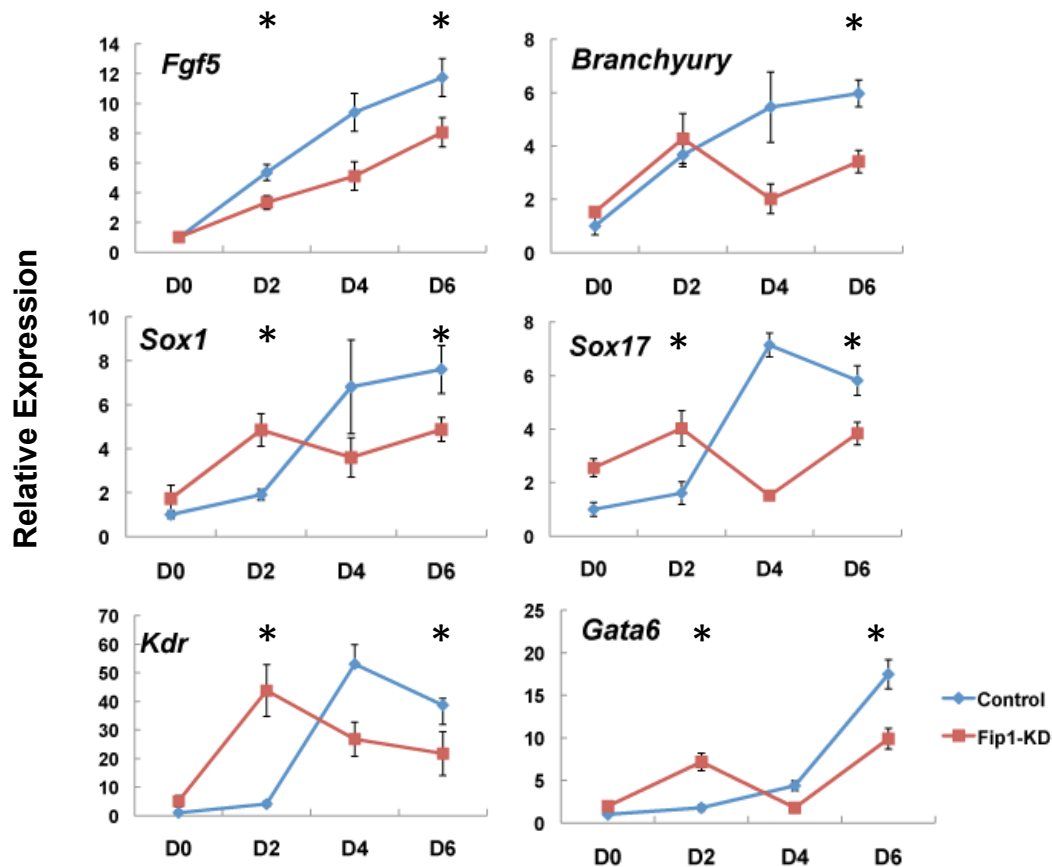

**Figure S4. Impact of Fip1 silencing on ESC pluripotency.** ESCs were transfected with control- or Fip1-siRNAs. Cells were collected two days post-transfection and plated for EB differentiation. EBs were collected at 0, 2, 4, 6 days (D0, 2, 4, and 6 on x axis) after the start of differentiation for RT-qPCR analyses of the specified genes. All samples are normalized to control on D0 and plotted as mean  $\pm$  SEM (n=3). \*: p<0.05.
