# Supplementary material
Source: PubMed Central journal article supplement (PMC4194112)
Supplement: embj0033-0878-sd5.pdf [file embj0033-0878-sd5.pdf]

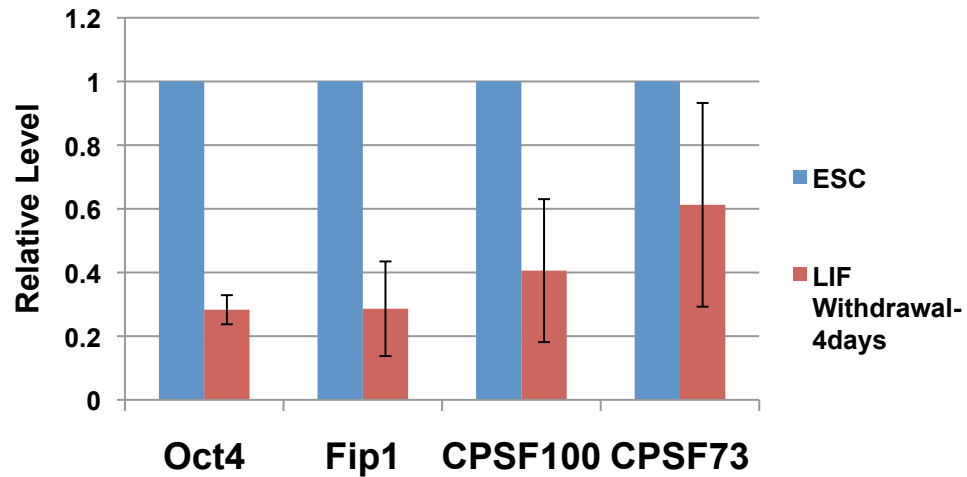

**Figure S5. Quantification of Western signals shown in main Figure 1E.** Western blot signals of Fip1, CPSF100, CPSF73, and Oct4 as shown in Fig. 1E are first normalized by GAPDH and this ratio in LIF withdrawal (4 days) are normalized to ESC samples and plotted as mean  $\pm$  SEM (n=3).
