# Supplementary material
Source: PubMed Central journal article supplement (PMC4194112)
Supplement: embj0033-0878-sd7.pdf [file embj0033-0878-sd7.pdf]

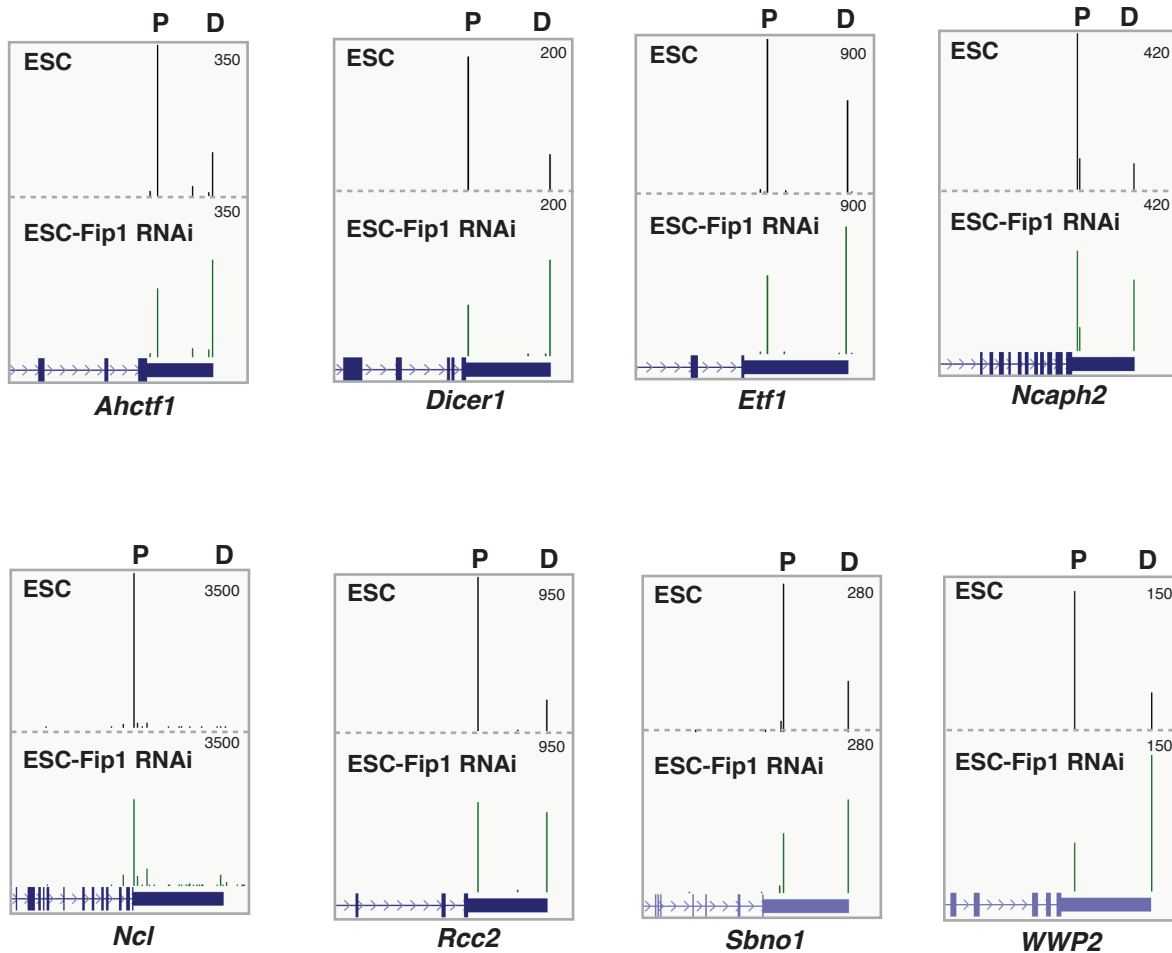

**Figure S7. UCSC Genome Browser tracks of the direct RNA sequencing (DRS) results for genes characterized in this study.** The top and bottom tracks are the DRS reads for mock-treated embryonic stem cell (ESC) and ESC treated with Fip1 specific siRNAs (ESC-Fip1 RNAi) respectively. The proximal (P) and distal (D) poly(A) sites for each gene are marked on top.
