# Supplementary material
Source: PubMed Central journal article supplement (PMC4194112)
Supplement: embj0033-0878-sd8.pdf [file embj0033-0878-sd8.pdf]

**A**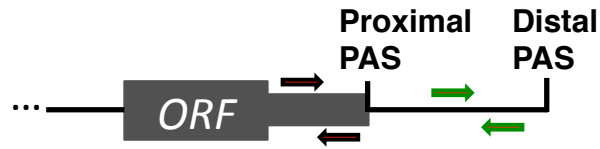**B**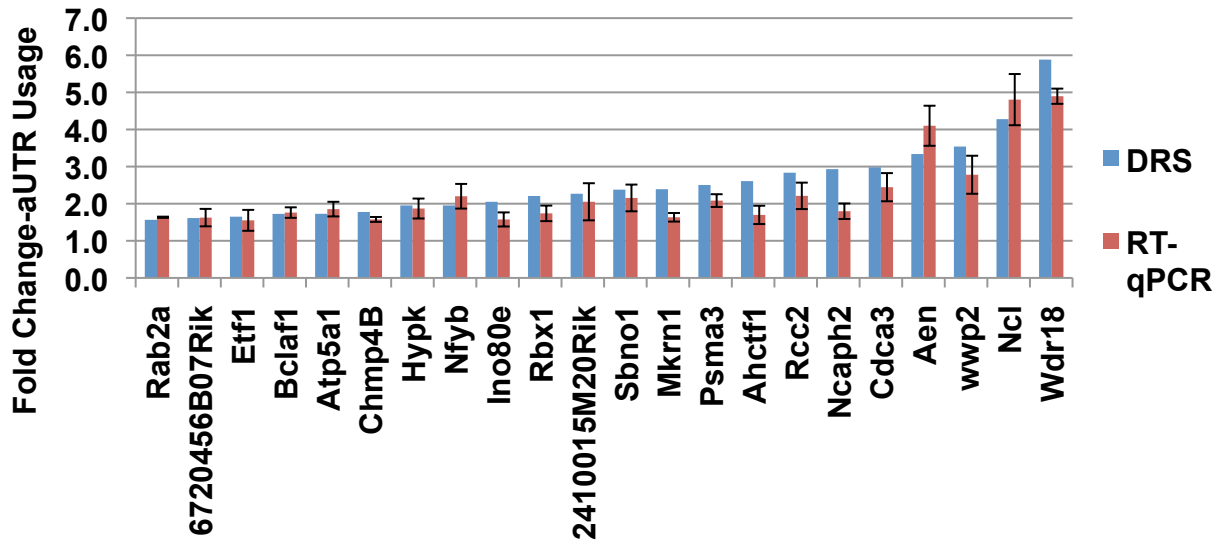**C**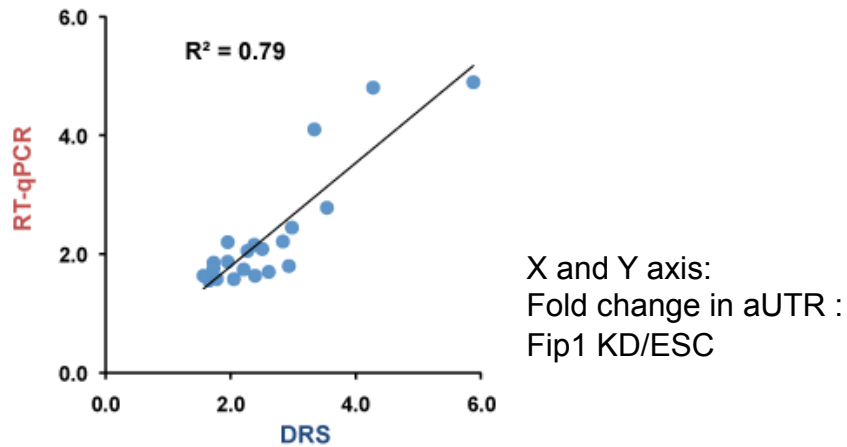

**Figure S8. Validation of APA fold change by RT-qPCR.** (A) Primer pairs used to detect common region and the eUTRs. (B) Comparison of relative fold change of aUTR (aUTR/common region) in Mock- or siFip1-2- treated ESCs based on DRS (blue columns) and RT-qPCR (shown are mean  $\pm$  SEM; n=3). (C) Correlation between fold change in aUTR usage based on DRS (X axis) and RT-qPCR as shown in B. R<sup>2</sup>=0.79.
