# Supplementary material
Source: PubMed Central journal article supplement (PMC4194112)
Supplement: embj0033-0878-sd9.pdf [file embj0033-0878-sd9.pdf]

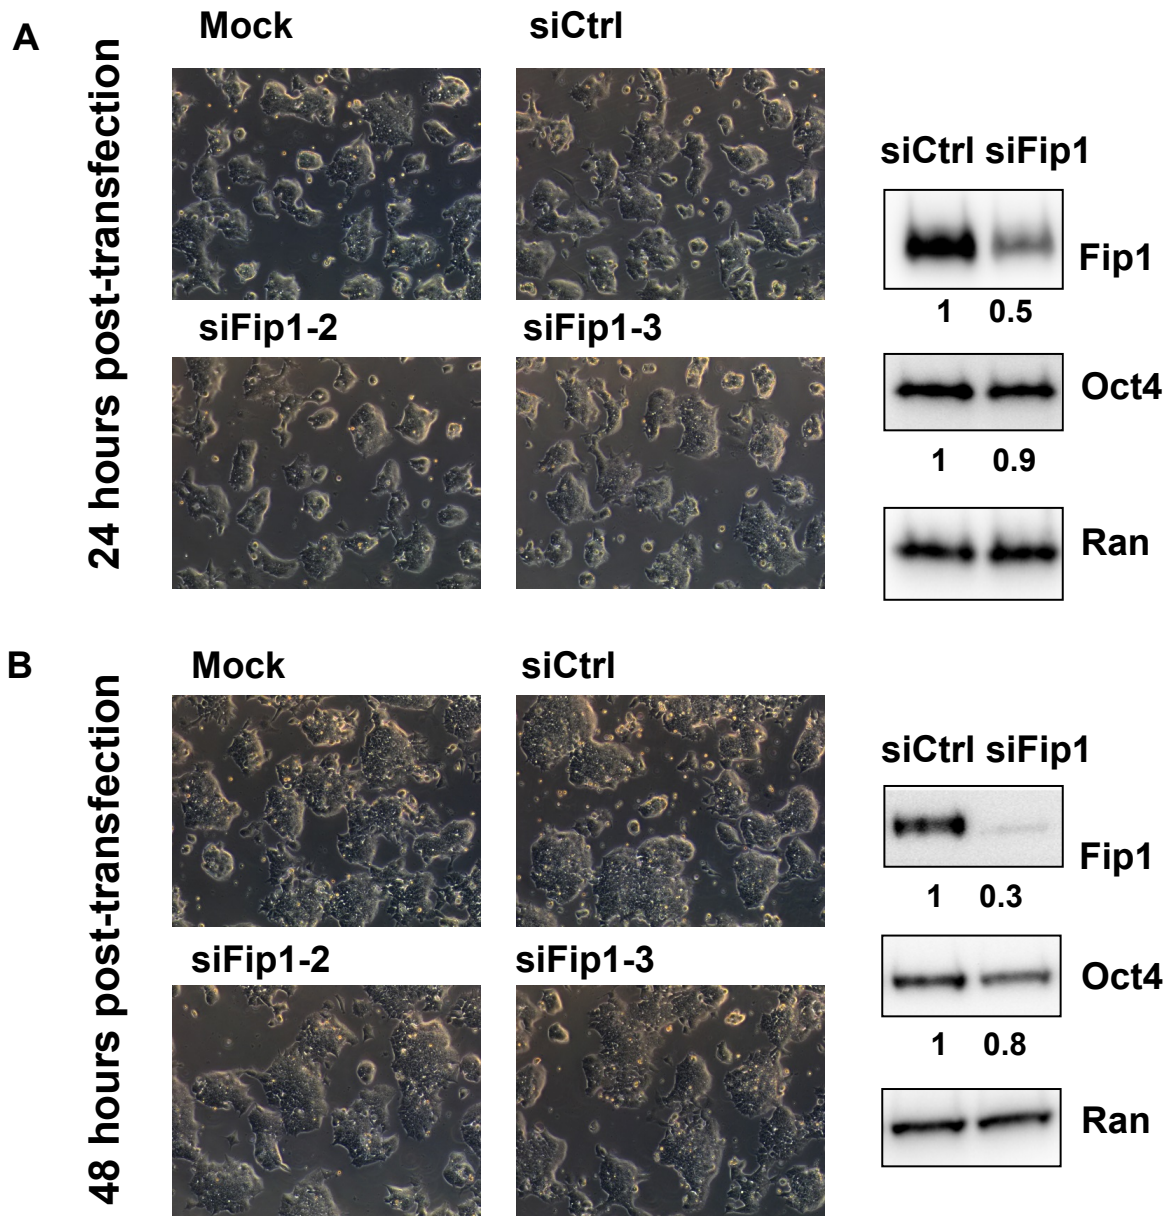

**Figure S9. APA changes precede differentiation after Fip1 knockdown. (A)** Left panel: cell morphology of ESCs 24 hours after transfection of specified siRNAs. Right panel: western blotting analysis of specified proteins. **(B)** Same as A at 48 hours post-transfection. Western quantification results are listed under the blots and the expression values are normalized to siCtrl.
