# Supplementary material
Source: PubMed Central journal article supplement (PMC4194112)
Supplement: embj0033-0878-sd10.pdf [file embj0033-0878-sd10.pdf]

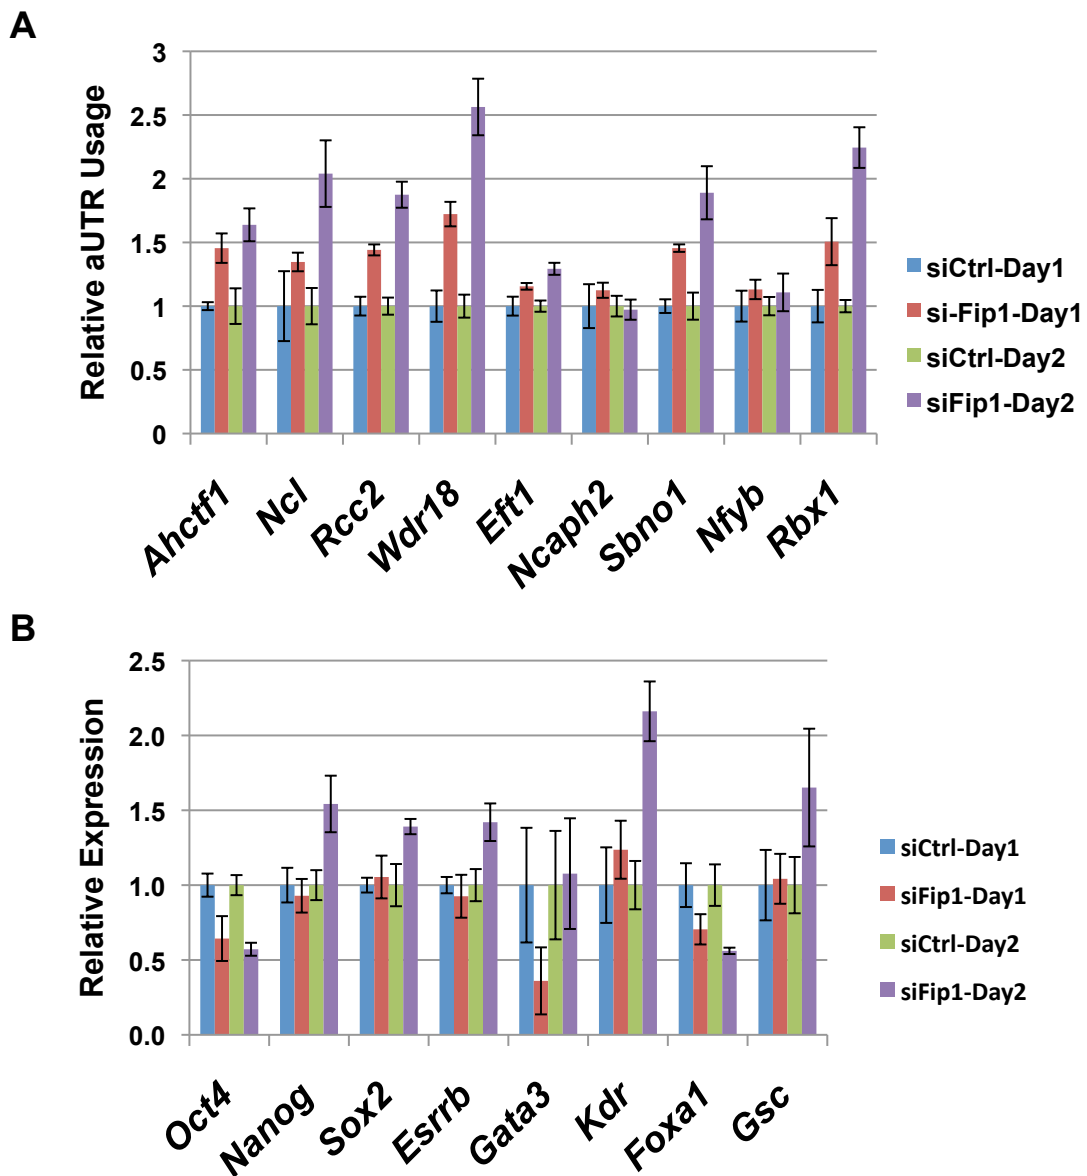

**Figure S10. APA changes precede differentiation after Fip1 knockdown.** (A) RT-qPCR quantification of relative aUTR usage (aUTR/common region) are normalized to the corresponding siCtrl sample and plotted as mean  $\pm$  SEM (n=3). (B) RT-qPCR analyses of the expression levels of the specified marker genes. Their levels in siFip1 samples are normalized to the corresponding siCtrl and plotted as mean  $\pm$  SEM (n=3).
