# Supplementary material
Source: PubMed Central journal article supplement (PMC4194112)
Supplement: embj0033-0878-sd11.pdf [file embj0033-0878-sd11.pdf]

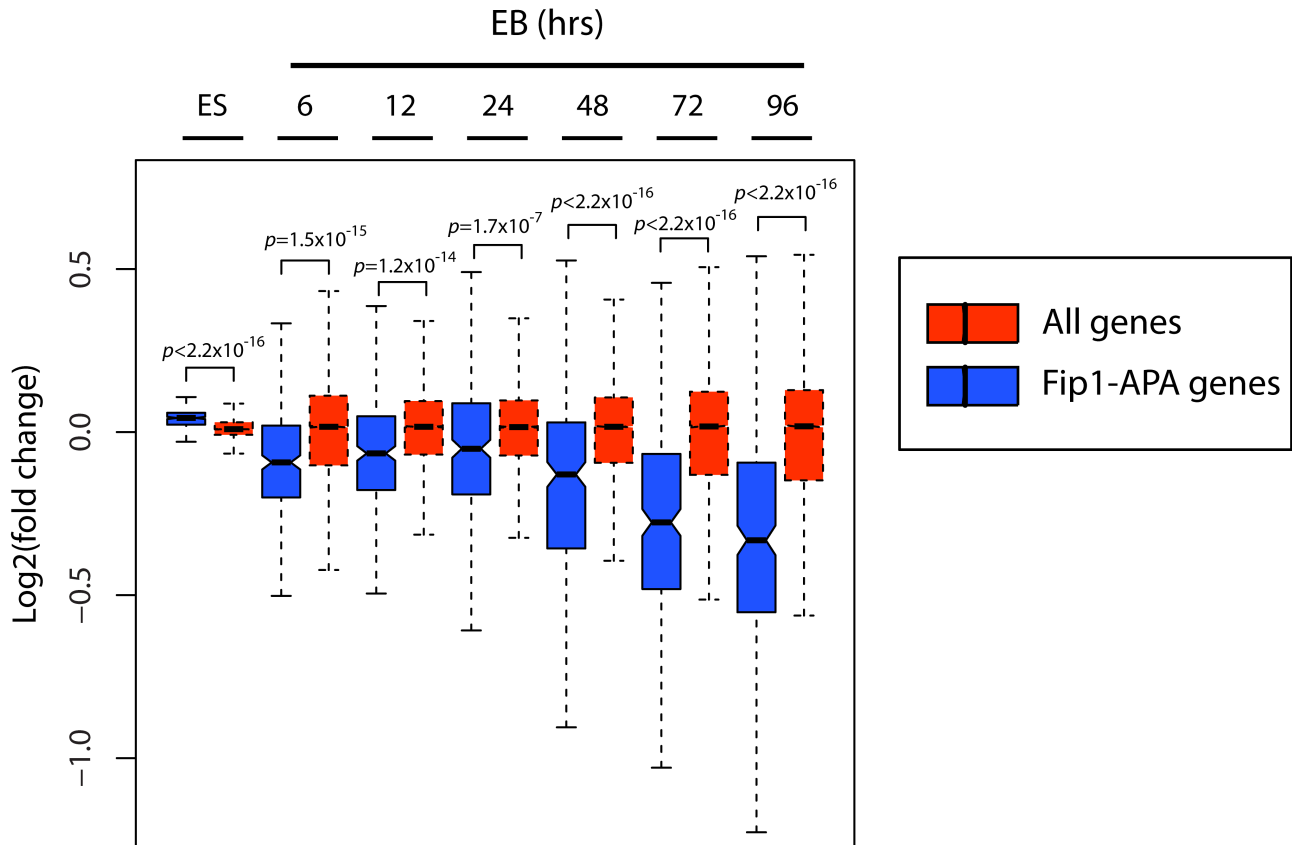

**Figure S11. Pairwise comparison of the expression of all expressed genes and Fip1-APA target genes during ESC EB differentiation time course.** The expression data for the EB differentiation time course was downloaded from GEO (accession GSE3749) and processed as described in the methods. The mean log<sub>2</sub> Fold-Change was calculated by contrasting each time point against 0 hours (the ESC state), for all expressed genes or Fip1 APA target genes. The p-values were calculated by Wilcoxon rank sum test.
