# Supplementary material
Source: PubMed Central journal article supplement (PMC4194112)
Supplement: embj0033-0878-sd12.pdf [file embj0033-0878-sd12.pdf]

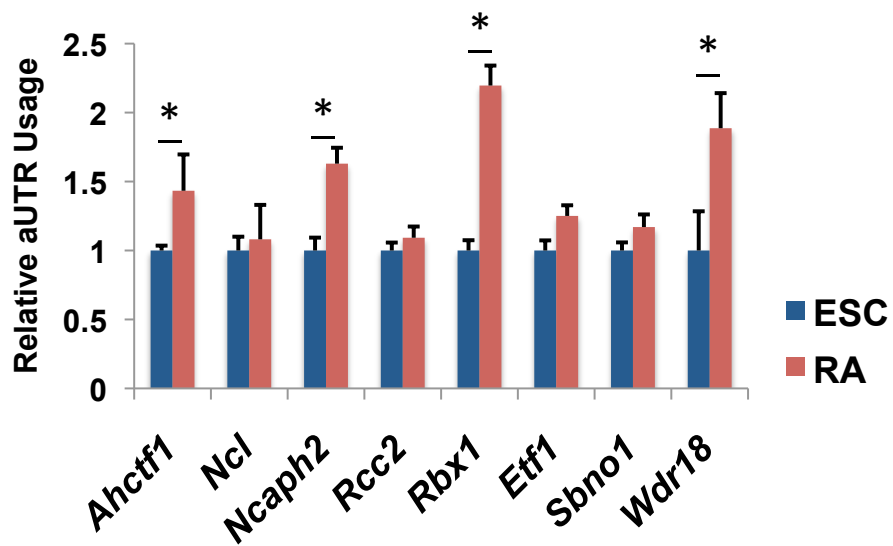

**Figure S12. The APA changes of Fip1 target mRNAs during retinoic acid (RA)-induced neural differentiation.**

RT-qPCR results of aUTR fold change (aUTR/common region) in retinoic acid-induced differentiation sample are normalized to ESC and plotted as mean  $\pm$  SEM (n=3). \*: p<0.05.
