# Supplementary material
Source: PubMed Central journal article supplement (PMC4194112)
Supplement: embj0033-0878-sd13.pdf [file embj0033-0878-sd13.pdf]

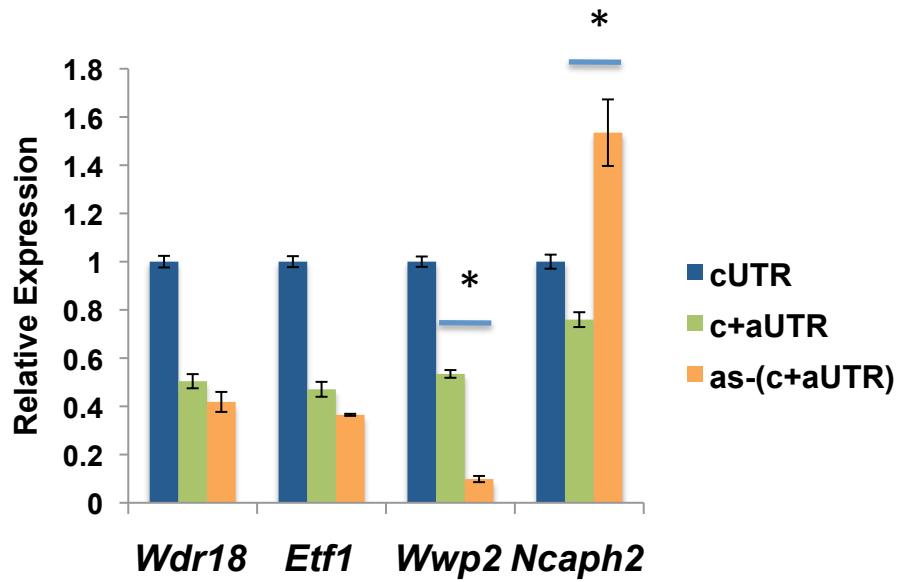

**Figure S13. The inhibitory effect of aUTRs cannot be solely attributed to their lengths.** Equal molar amount of Fluc reporters containing the specified UTRs are transfected with an Rluc control. The Fluc/Rluc ratio in each sample is normalized to cUTR values and plotted as mean  $\pm$  SEM (n=3).
