# Supplementary material
Source: PubMed Central journal article supplement (PMC4194112)
Supplement: embj0033-0878-sd14.pdf [file embj0033-0878-sd14.pdf]

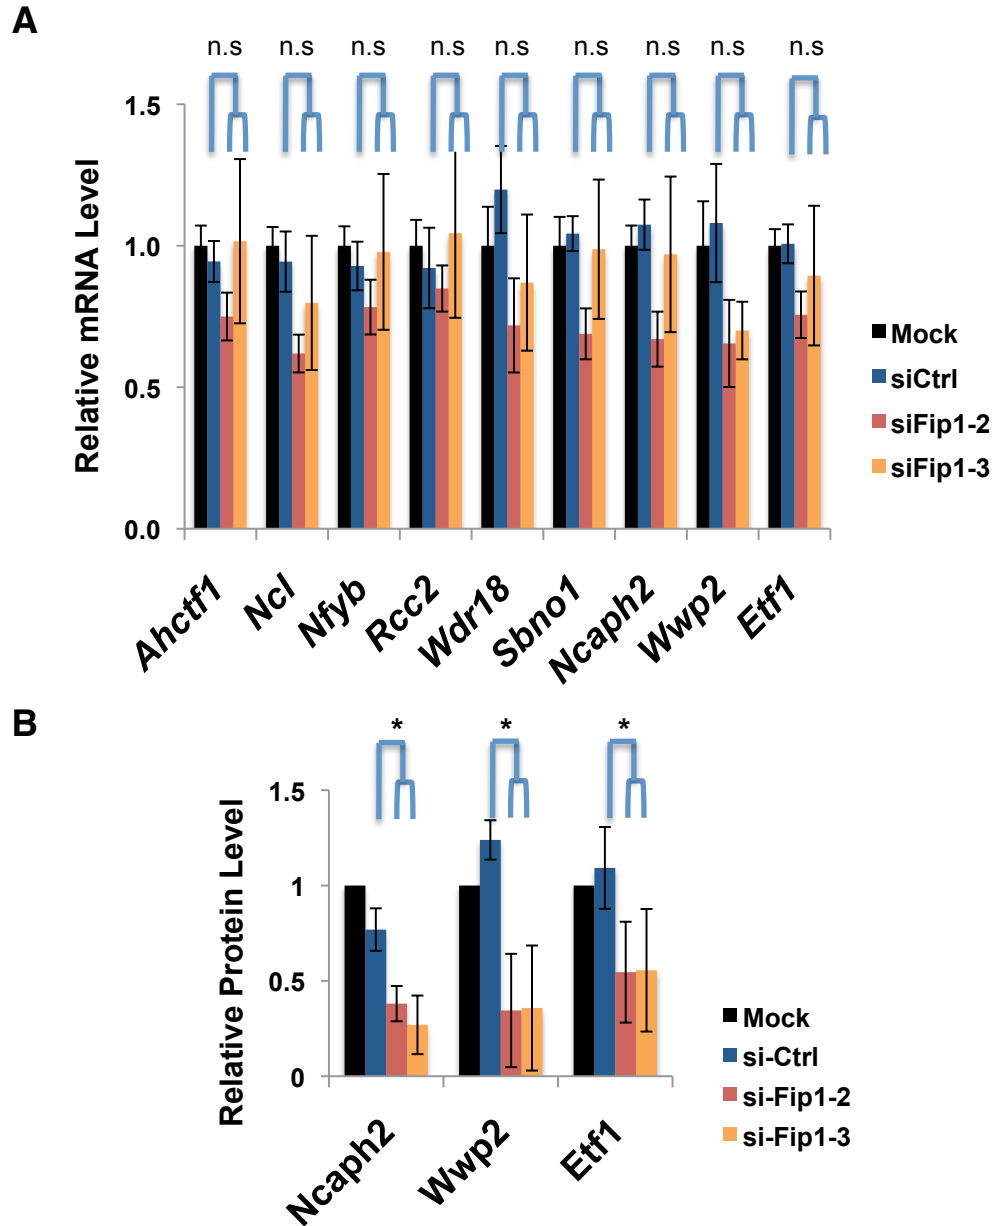

**Figure S14. The mRNA and protein levels of Fip1 APA target genes.** (A) RT-qPCR results of Fip1-APA targets normalized to Actin. Data represents the average of two biological replicates with four technical repeats each (mean  $\pm$  SEM). p values for the differences between siCtrl and the average of siFip1-2 and siFip2-3 are not significant (n.s:  $p > 0.05$ , t test) (B) Quantification of western blots as shown in main Figure 3B using the same procedure as described in Supplementary Figure 1B. (mean  $\pm$  SEM;  $n = 3$ ).\*:  $p < 0.05$  (t test).
