# Supplementary material
Source: PubMed Central journal article supplement (PMC4194112)
Supplement: embj0033-0878-sd15.pdf [file embj0033-0878-sd15.pdf]

**A**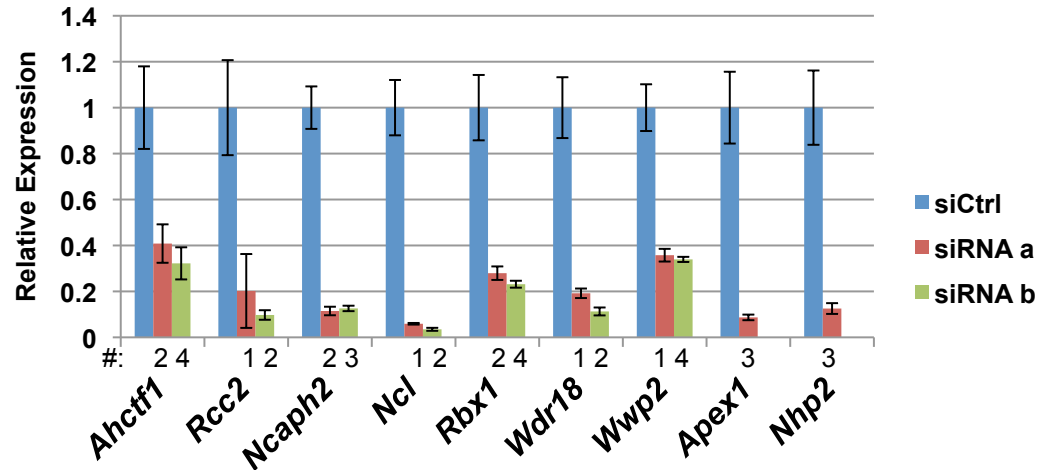**B**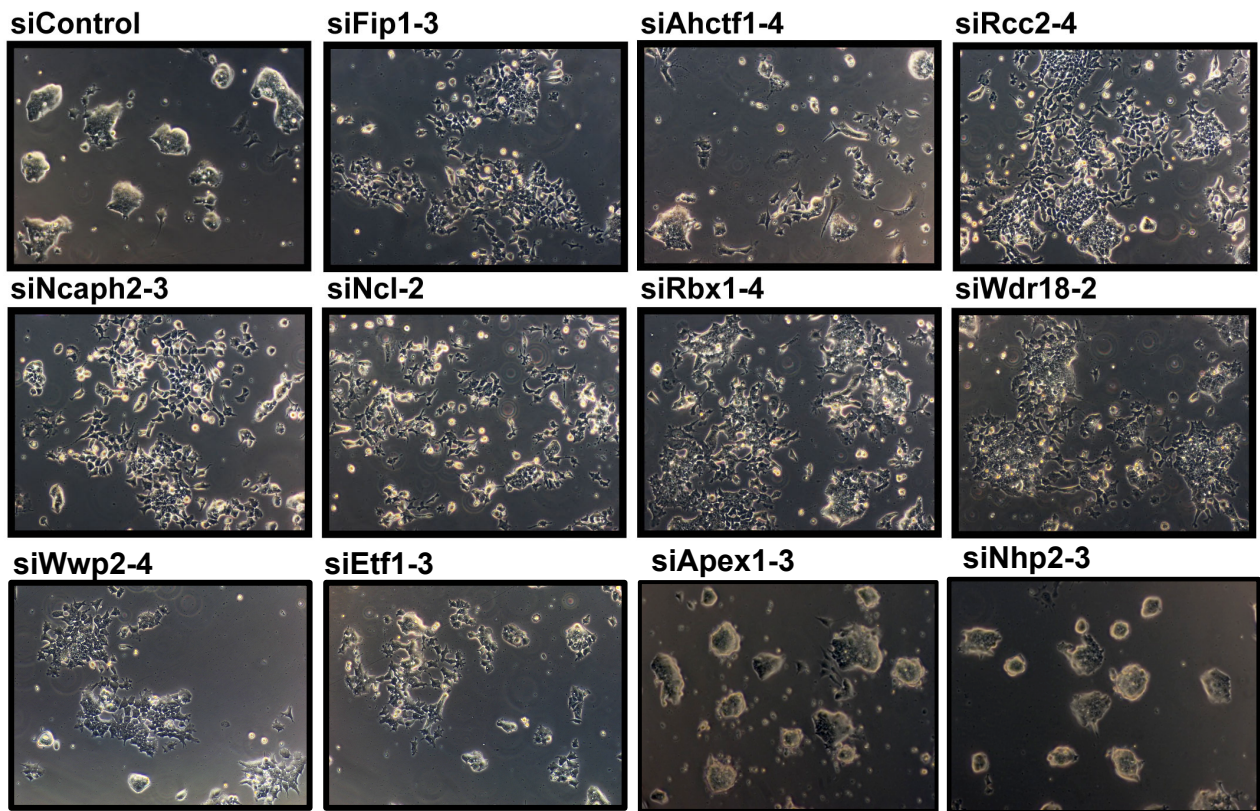

**Figure S15. The functions of Fip1 APA-targets in ESC self-renewal. (A)** RT-qPCR results of specified genes (x axis) are normalized to siCtrl (blue) and plotted as mean  $\pm$  SEM (n=3). The specific number of the siRNA is marked on the X axis. **(B)** Phase-contrast images of ESCs transfected with siRNAs against the specified targets (similar to Fig. 3D, but with a different siRNA to rule out off-target effects).
