# Supplementary material
Source: PubMed Central journal article supplement (PMC4194112)
Supplement: embj0033-0878-sd16.pdf [file embj0033-0878-sd16.pdf]

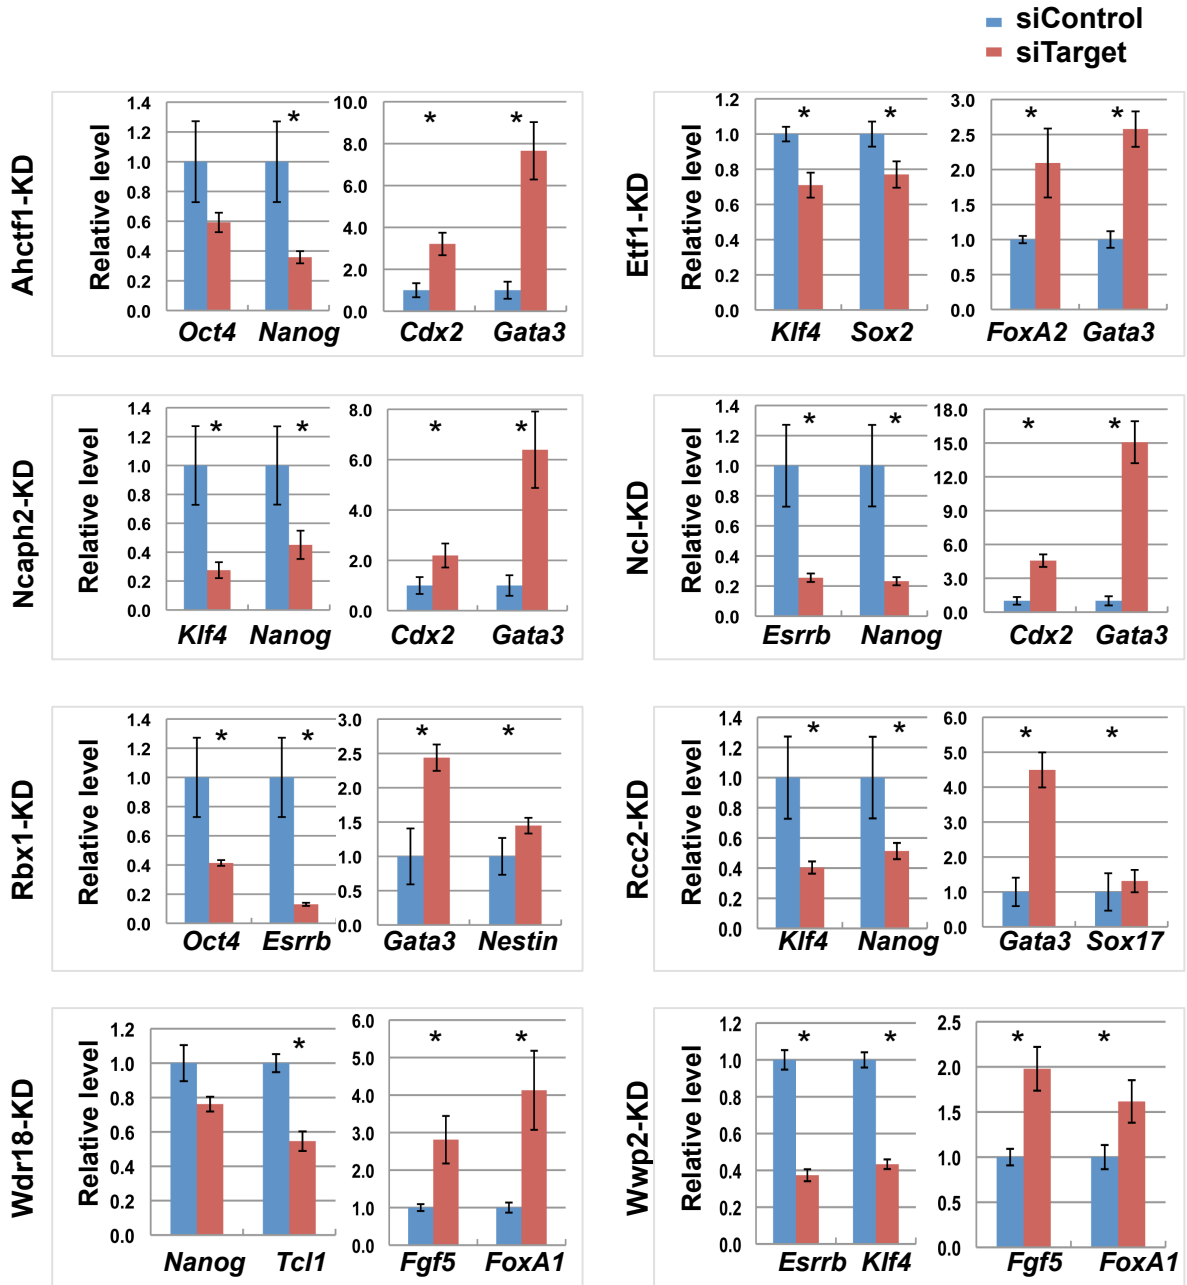

**Figure S16. The effect of Fip1 target gene depletion on ESC self-renewal.** RT-qPCR analyses of ESCs four days after transfection of siControl and siRNA against specific target (inset). Relative mRNA levels of each target are normalized to siControl (blue) and plotted as mean ± SEM (n=3). \*: p<0.05.
