# Supplementary material
Source: PubMed Central journal article supplement (PMC4194112)
Supplement: embj0033-0878-sd17.pdf [file embj0033-0878-sd17.pdf]

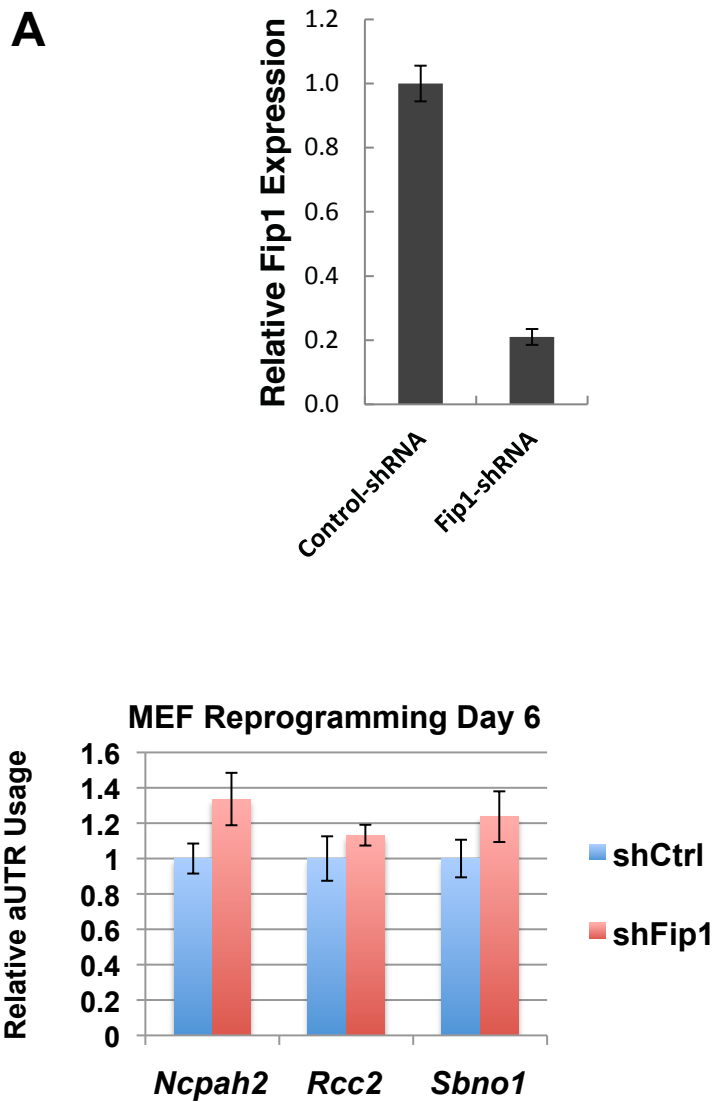

**Figure S17. The role of Fip1 in reprogramming.**

**(A)** RT-qPCR verification of Fip1 knockdown in MEFs using a lentiviral-based shRNA. RT-qPCR to detect Fip1 mRNA in the specified samples four days post-infection. (Mean  $\pm$  SEM; n=3). **(B)** 6 days after MEFs expressing control or Fip1 shRNA are induced to reprogram, RNAs are harvested and analyzed by RT-qPCR. aUTR usage levels are normalized to that of control (shCtrl) and plotted as mean  $\pm$  SEM (n=3).
