# Supplementary material
Source: PubMed Central journal article supplement (PMC4194112)
Supplement: embj0033-0878-sd18.pdf [file embj0033-0878-sd18.pdf]

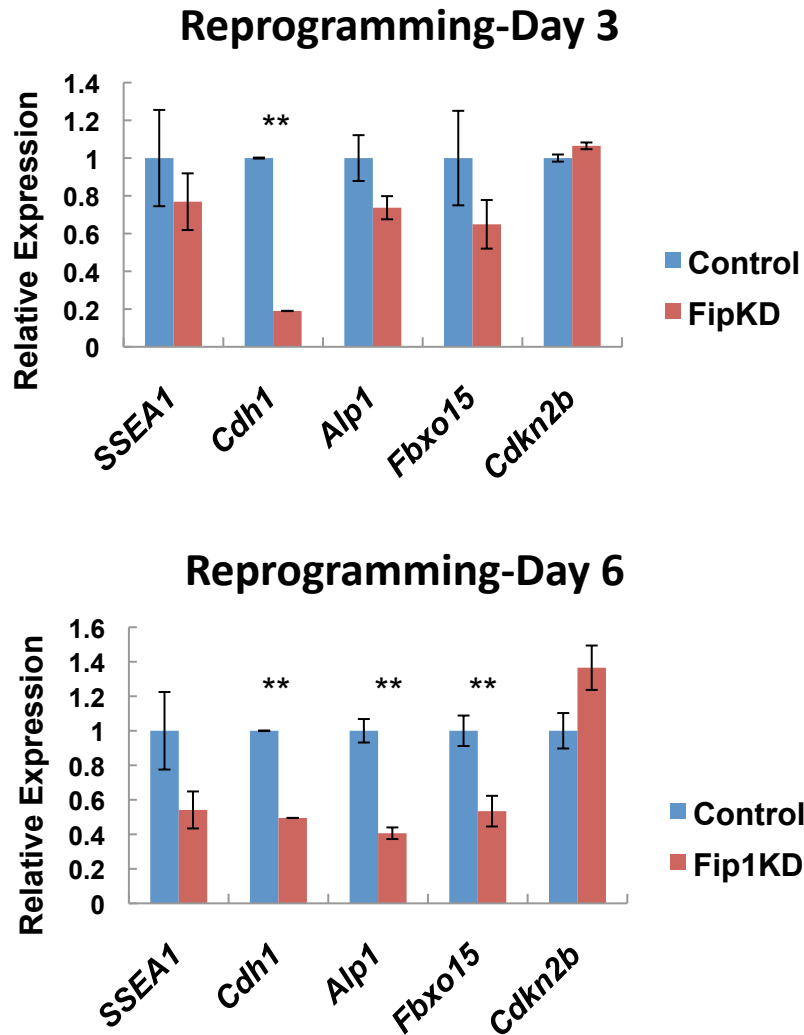

**Figure S18. Fip1 function in early stages of reprogramming.** RT-qPCR analyses of specified marker genes on day 3 (top panel) or day 6 (bottom panel) after induction of reprogramming. Fip1 KD results are normalized to siControl and plotted as mean  $\pm$  SEM (n=3). \*\*: p<0.01.
