# Supplementary material
Source: PubMed Central journal article supplement (PMC4194112)
Supplement: embj0033-0878-sd19.pdf [file embj0033-0878-sd19.pdf]

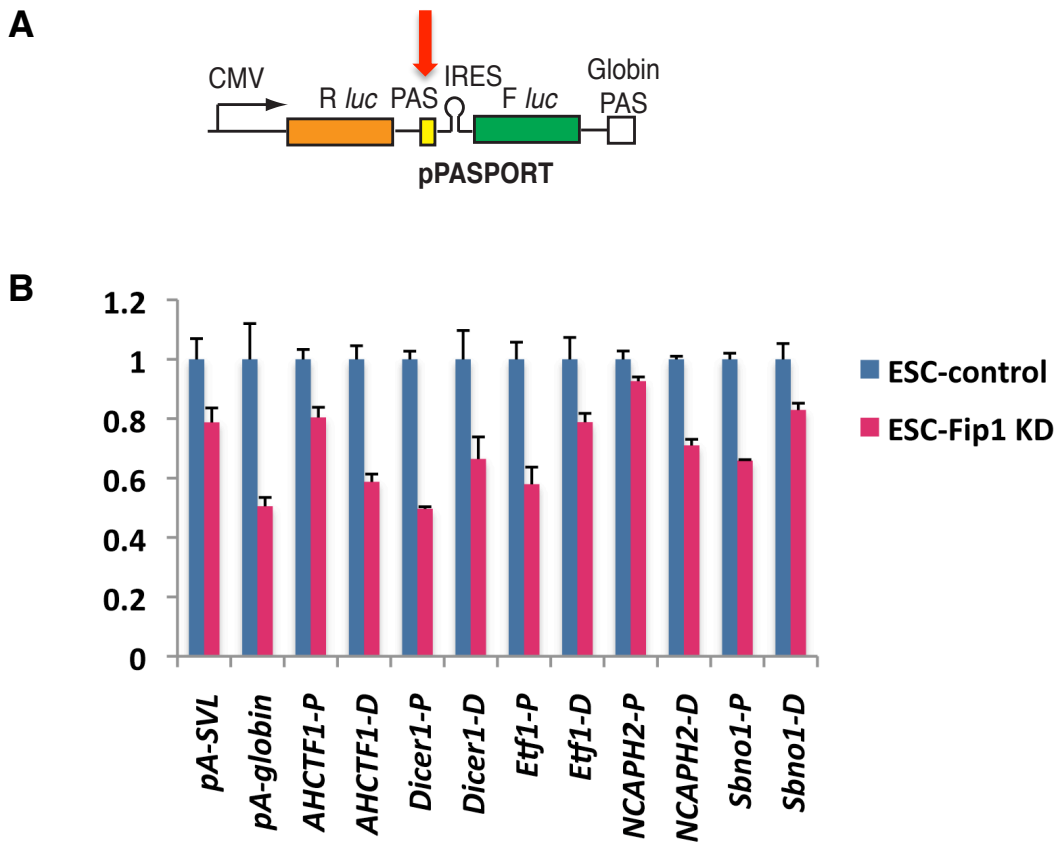

**Figure S19. The effect of Fip1 depletion on mRNA 3' processing activities determined by in vivo reporter assays. (A)** Design of the pPASPORT reporter. Poly(A) sites of interest are inserted into the yellow box (PAS) marked by the red arrow. Rluc: Renilla luciferase. Fluc: firefly luciferase. IRES: ECMV internal ribosomal entry site. **(B)** pPASPORT constructs containing the specified poly(A) sites were transfected into ESCs that had been transfected with control (blue bars) or Fip1-specific siRNAs (red bars) and the poly(A) site activities (Rluc/Fluc ratio) were measured and plotted. (mean  $\pm$  SEM). P: proximal PAS. D: distal PAS. SVL: SV40 late transcript poly(A) site.  $p < 0.05$  for all genes.
