# Supplementary material
Source: PubMed Central journal article supplement (PMC4194112)
Supplement: embj0033-0878-sd20.pdf [file embj0033-0878-sd20.pdf]

**A**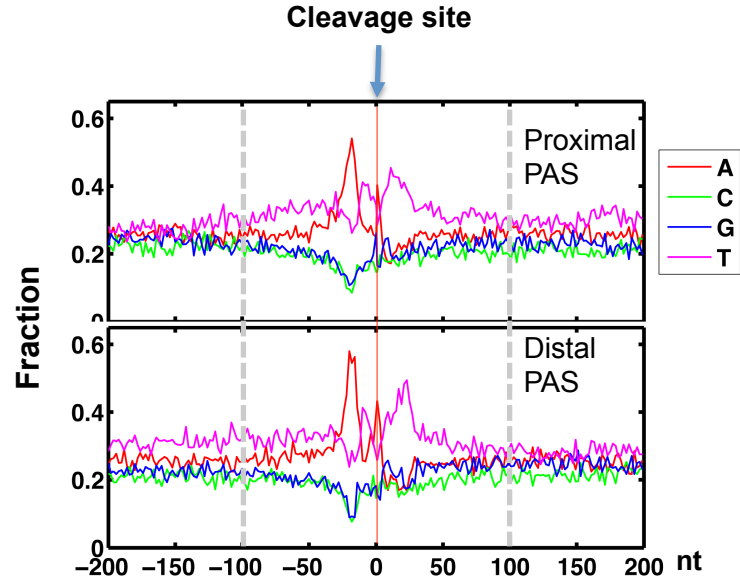**B**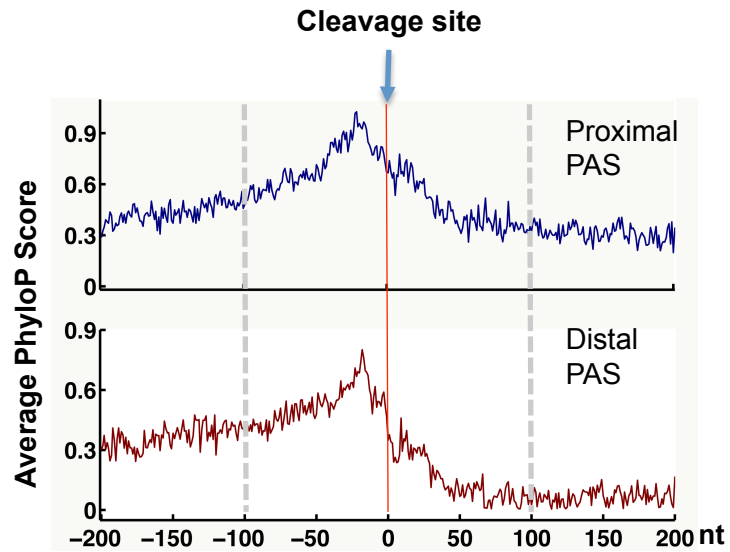

**Figure S20. Analyses of PAS sequences of Fip1 APA targets.** (A) Average nucleotide composition of the proximal and distal PASs in Fip1 APA targets. The fraction of each nucleotide (y axis) is plotted from -100 to +100nt relative to the cleavage site (x axis). (B) Average sequence conservation (PhyloP score) of the proximal and distal PASs in Fip1 APA targets within the same region.
