# Supplementary material
Source: PubMed Central journal article supplement (PMC4194112)
Supplement: embj0033-0878-sd22.pdf [file embj0033-0878-sd22.pdf]

| <b>-100-0nt</b> |         | <b>0-+100nt</b> |         |
|-----------------|---------|-----------------|---------|
| Motif           | Z-score | Motif           | Z-score |
| AATAAA          | 5.1     | TCTGTG          | 5.2     |
| TTTTGT          | 4.6     | CTGTGG          | 4.4     |
| CTTTTG          | 4.3     | TTCTGT          | 4.2     |
| TGTATT          | 4.3     | CTGTGT          | 3.9     |
| TTGTAA          | 4.3     |                 |         |
| ATAAAC          | 4.2     |                 |         |
| ATAAAG          | 4.2     |                 |         |
| TTAAAG          | 4.1     |                 |         |
| TAAAGT          | 3.8     |                 |         |
| TTTGTA          | 3.7     |                 |         |

**Figure S22. Comparison of the proximal PAS of Fip1 APA target vs. non-target.** Motif analyses of the proximal PASs of Fip1 APA target using the proximal PAS of non-target genes as background. Two regions (-100nt to 0nt and 0-+100nt, 0nt being the cleavage site) are analyzed separately. Enriched hexamer motifs and the corresponding Z-scores are shown. Z-scores above 3 are considered significant enrichment.
