# Supplementary material
Source: PubMed Central journal article supplement (PMC4194112)
Supplement: embj0033-0878-sd24.pdf [file embj0033-0878-sd24.pdf]

**A**

| Group A genes<br>Enriched functional category | $-\log_{10}(\text{p value})$ |
|-----------------------------------------------|------------------------------|
| None                                          | n/a                          |

| Group B genes<br>Enriched functional category | $-\log_{10}(\text{p value})$ |
|-----------------------------------------------|------------------------------|
| Mitochondrial dysfunction                     | <b>9.6</b>                   |
| tRNA charging                                 | <b>8.6</b>                   |
| Hereditary breast cancer signaling            | <b>7.0</b>                   |
| Molecular mechanisms of cancer                | <b>7.0</b>                   |
| Huntington's disease signaling                | <b>6.3</b>                   |

**B**

|                            | <b>-100-0nt</b> |         | <b>0-+100nt</b> |         |
|----------------------------|-----------------|---------|-----------------|---------|
|                            | Motif           | Z-score | Motif           | Z-score |
| <b>Depleted in group A</b> | AATAAA          | -2.8    | TGTGTT          | -2.8    |
| <b>Enriched in group A</b> | CTTCTA          | 8.6     | AGCGGG          | 6.6     |
|                            | CGGAGG          | 6.0     | CACCGA          | 6.6     |
|                            | CTCAAG          | 4.9     | TCTAGG          | 5.1     |
|                            | GTTAGC          | 4.5     | TGACTA          | 4.9     |
|                            | ACCAAT          | 4.1     | GAATGA          | 4.1     |

**Figure S24. Analyses of single-PAS genes.** (A) Gene ontology analyses of the 77 single-PAS genes whose mRNA levels significantly decreased in Fip1 KD cells (group A genes) and the 5870 single-PAS genes whose mRNA levels did not change (group B). Functional categories and the  $-\log_{10}(\text{p value})$  are shown. (B) Sequence comparison between the PASs of group A and B genes. Motif sequences and the corresponding Z-scores are shown.
