# Supplementary material
Source: PubMed Central journal article supplement (PMC4194112)
Supplement: embj0033-0878-sd25.pdf [file embj0033-0878-sd25.pdf]

**A**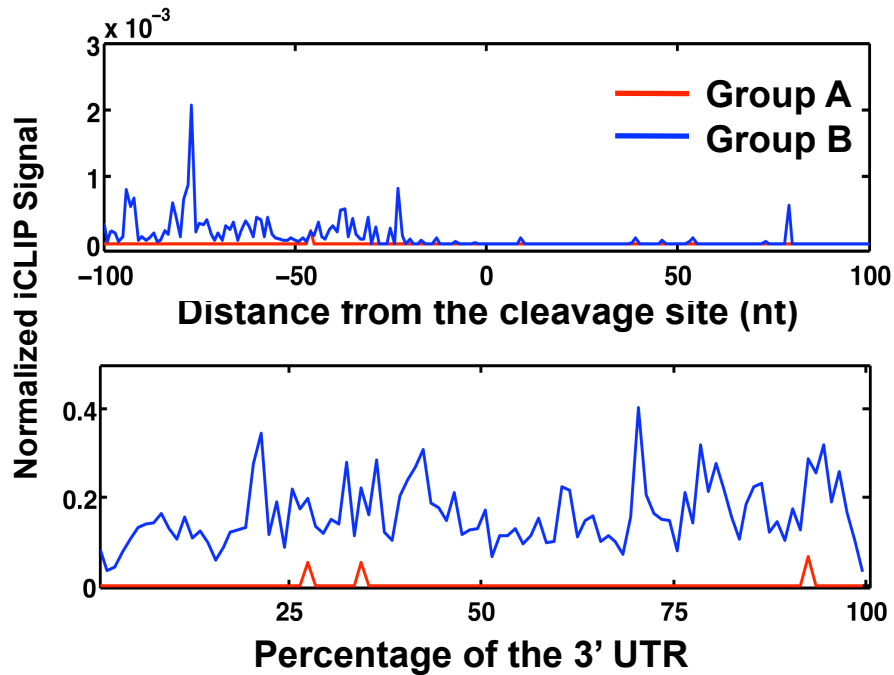**B**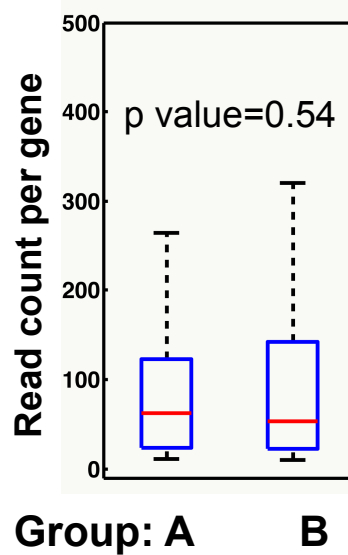

**Figure S25. Analyses of single-PAS genes. (A)** Fip1 iCLIP map for group A (the 77 genes that showed significant decrease in mRNA levels in Fip1 KD cells) and the rest of single-PAS genes (group B). The iCLIP maps are made as described for Figure 5E. Top: iCLIP map for -100nt to +100nt relative to the cleavage site (0 nt). P value for the difference between A and B:  $8.06 \times 10^{-10}$ ; Bottom: iCLIP map for the whole 3' UTR. p value for the difference between group A and B:  $2.36 \times 10^{-62}$ . **(B)** DRS read counts for genes in group A and B. No significant difference was detected.
