# Supplementary material
Source: PubMed Central journal article supplement (PMC4194112)
Supplement: embj0033-0878-sd26.pdf [file embj0033-0878-sd26.pdf]

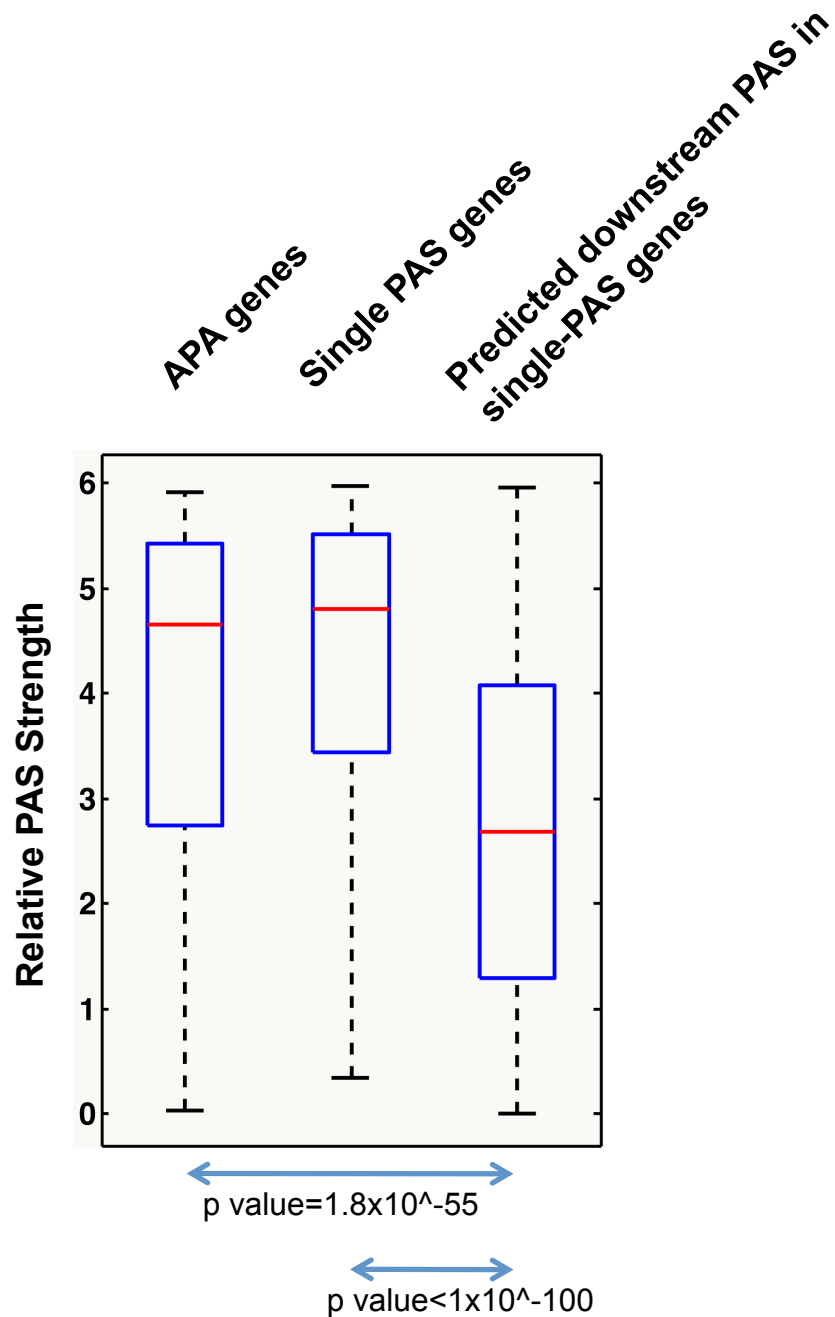

**Figure S26. The predicted strength of potential downstream PAS of single-PAS genes.** A box plot showing the predicted strength of the PAS of APA genes, single-PAS genes, and the predicted downstream PAS for single-PAS genes. The values on y-axis are calculated as:  $(6 - \text{SVM score})$ . The p values for the pair-wise comparisons are calculated based on ks-test and marked below the plot.
