# Supplementary material
Source: PubMed Central journal article supplement (PMC4194112)
Supplement: embj0033-0878-sd27.pdf [file embj0033-0878-sd27.pdf]

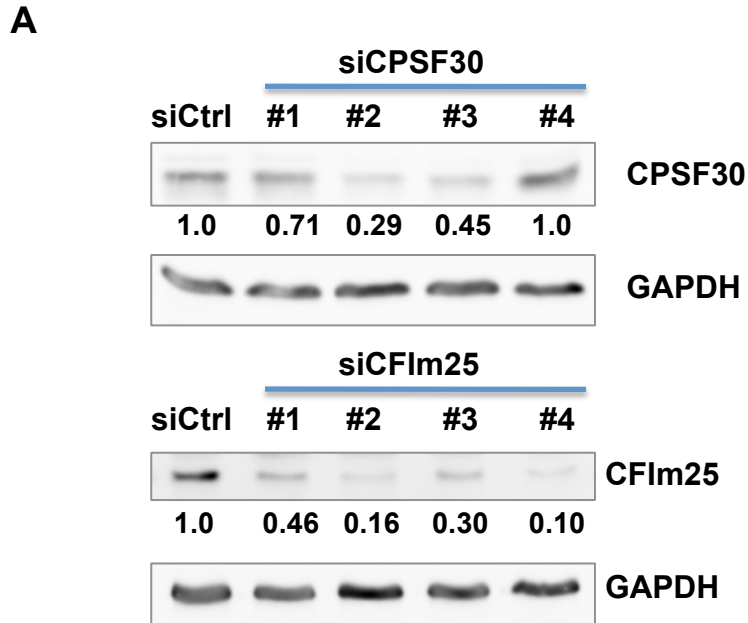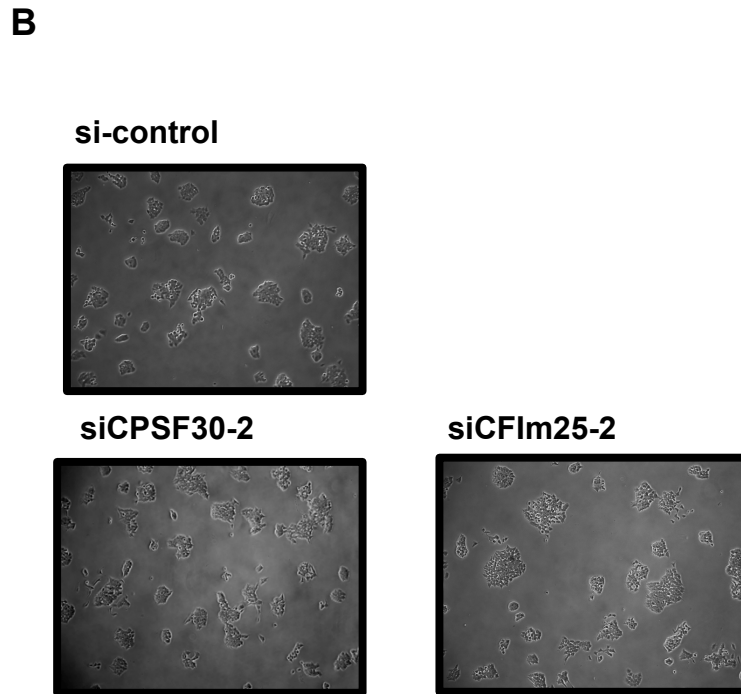

**Figure S27. CPSF30 and CFIm25 depletion on ESC.** (A) Western analyses of CPSF30 and CFIm 25 3 days after ESCs were transfected with control or CPSF30- or CFIm25-specific siRNAs (4 distinct siRNAs for each target gene). Quantification (CPSF30 or CFIm25/GAPDH) results are listed below the blot. (B) Phase contrast images of ESCs transfected with control siRNAs or Fip1-2, CPSF30-2, CFIm25-2 siRNAs (3 days post-transfection).
