# Supplementary material
Source: PubMed Central journal article supplement (PMC4194112)
Supplement: embj0033-0878-sd28.pdf [file embj0033-0878-sd28.pdf]

**A**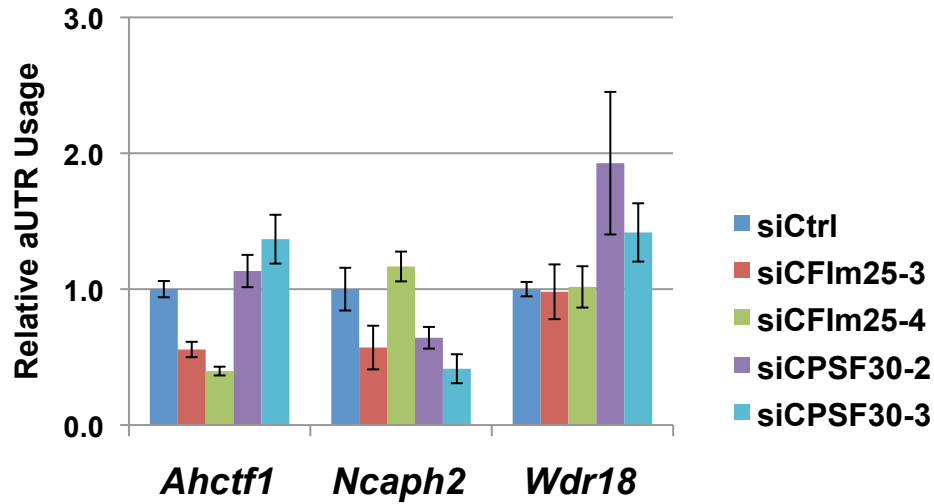**B**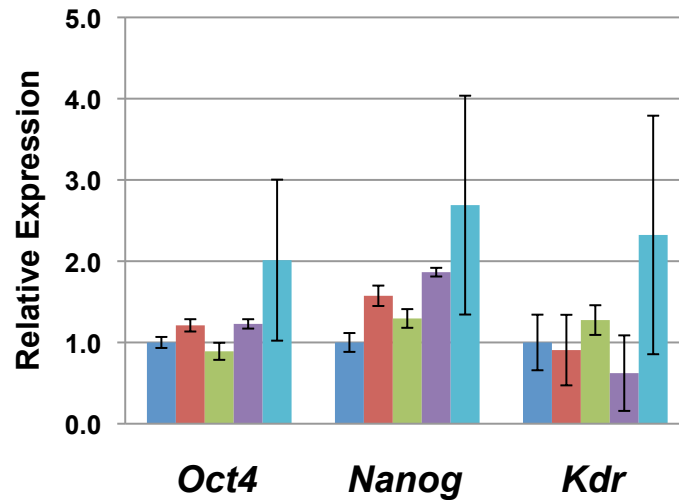

**Figure S28. The effect of CPSF30 and CFIm25 depletion on APA and ESC.** (A) aUTR RT-qPCR results 3 days after ESCs are transfected with the specified siRNAs are normalized to siCtrl and plotted as mean $\pm$ SEM (n=3). (B) RT-qPCR analyses of ESC (*Oct4* and *Nanog*) and differentiation marker (*Kdr*) in the same samples used in (A). Expression values are normalized to siCtrl and plotted as mean $\pm$ SEM (n=3).
