# Supplementary material
Source: PubMed Central journal article supplement (PMC4194112)
Supplement: embj0033-0878-sd29.pdf [file embj0033-0878-sd29.pdf]

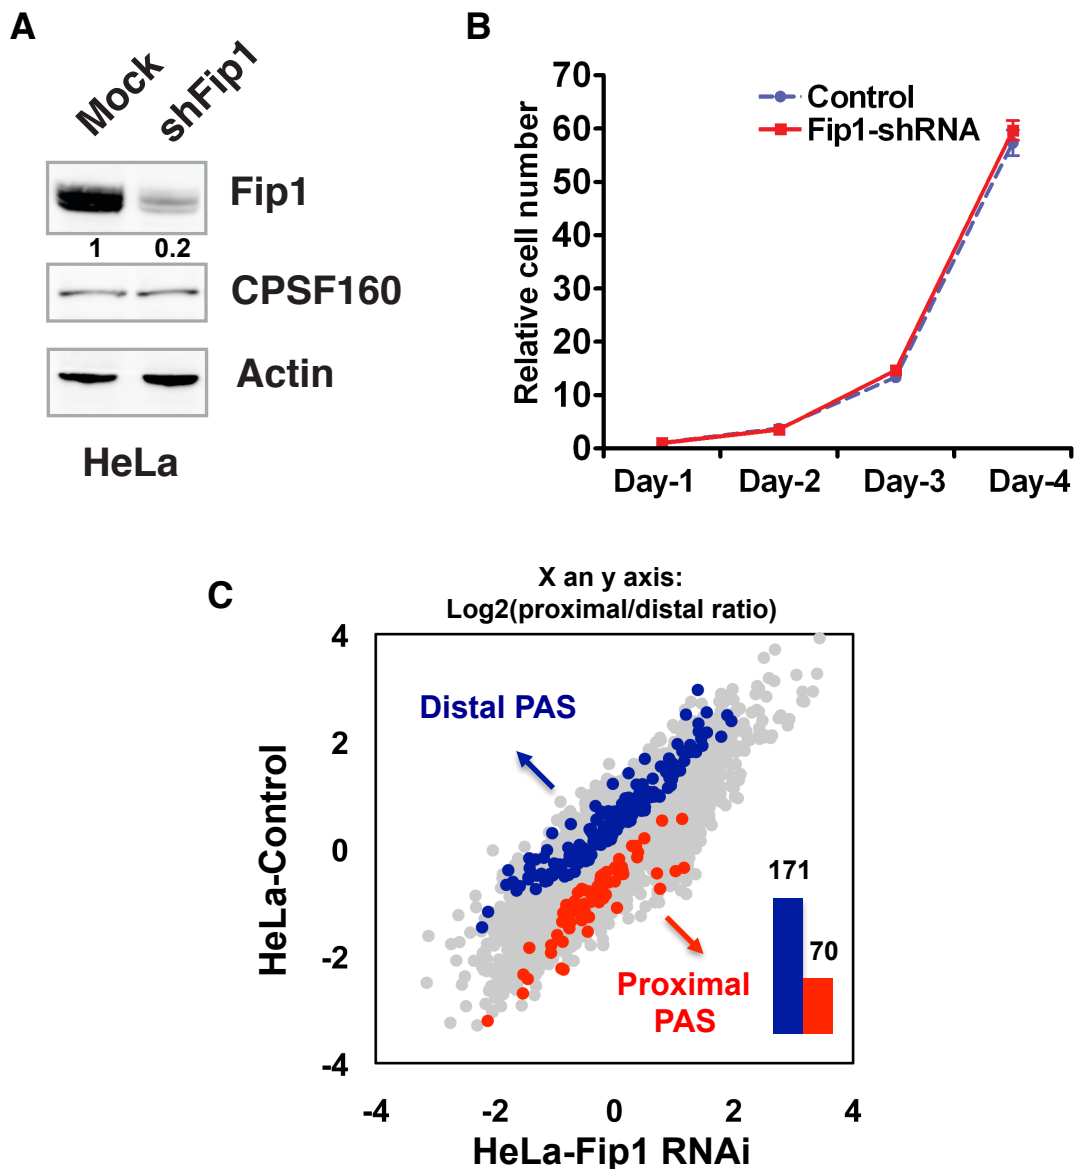

**Figure S29. Fip1 depletion in HeLa cells does not affect cell growth. (A)** Western blotting analysis of control HeLa cells and a Fip1 stable knockdown cell line. Fip1/actin ratio is quantified and normalized to mock and marked below the blot. **(B)** Comparison of the cell growth rates between control HeLa cells (blue dotted line) and the Fip1 stable knockdown cell line (red line) (plotted as mean  $\pm$  standard deviation). **(C)** Fip1 KD induces global APA changes in HeLa cells. The scatter plot is similar to Fig. 2A. Blue dots are significant PtoD APA changes and red dots, DtoP.
