# Supplementary material
Source: PubMed Central journal article supplement (PMC4194112)
Supplement: embj0033-0878-sd30.pdf [file embj0033-0878-sd30.pdf]

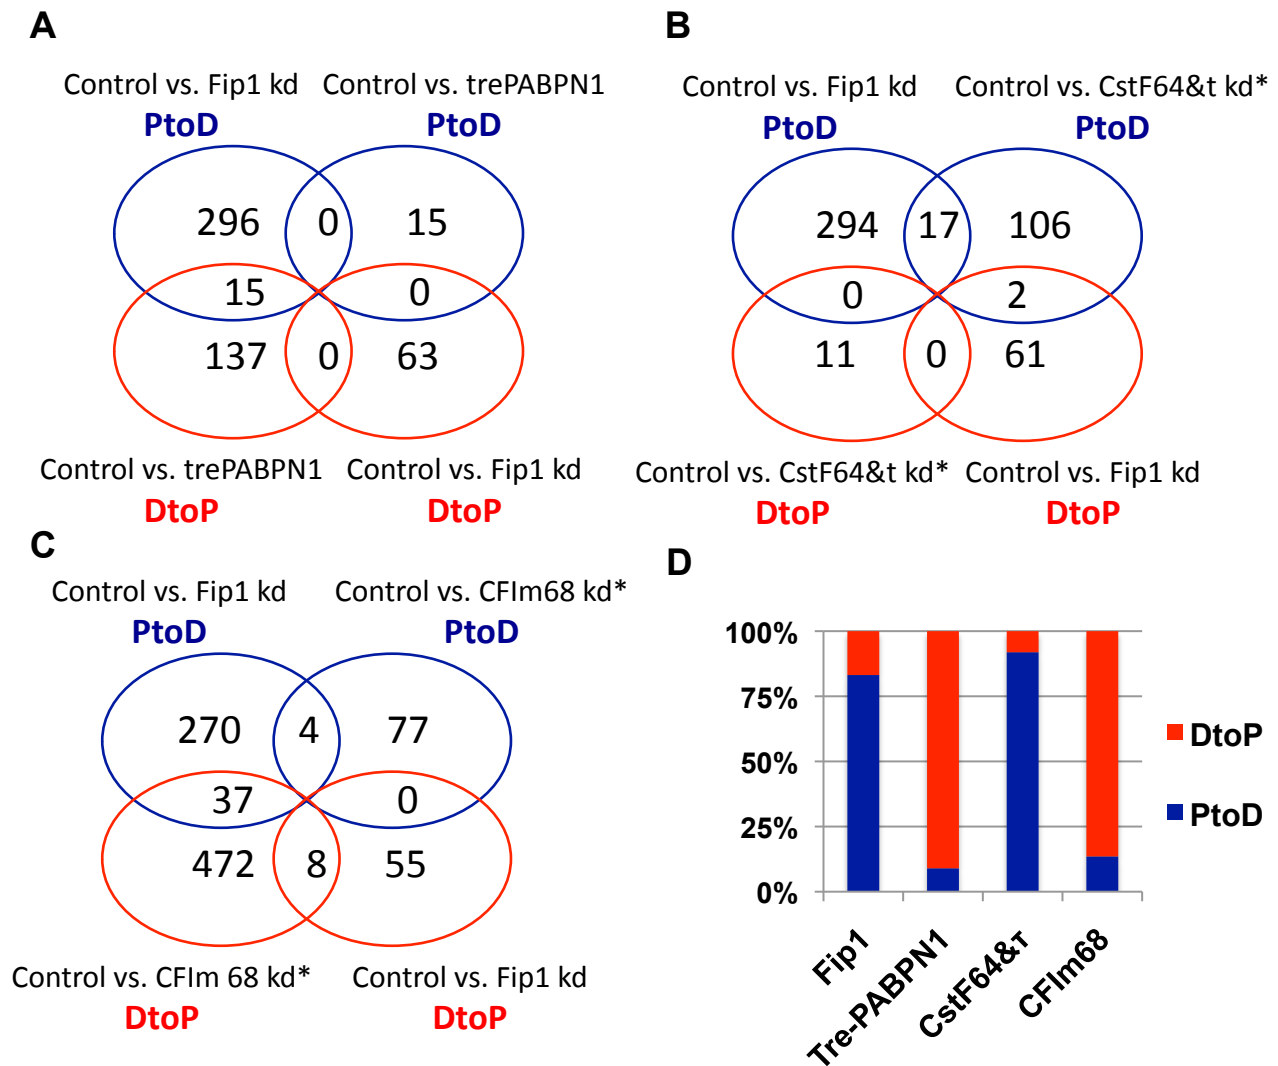

**Figure S30. Comparison between APA regulation by Fip1 and by PABPN1, CstF64&t, or CFIm68. (A-C)** Venn diagrams showing overlap between the APA target genes of Fip1 and those of the specified factors. APA changes were divided into PtoD or DtoP groups. \*: these studies were carried out in human cells. (D) Column graphs showing the percentage of PtoD and DtoP APA changes induced the knockdown of the specified factors or the expression of a mutant form (tre-PABPN1).
