# Supplementary material
Source: PubMed Central journal article supplement (PMC4194112)
Supplement: embj0033-0878-sd31.pdf [file embj0033-0878-sd31.pdf]

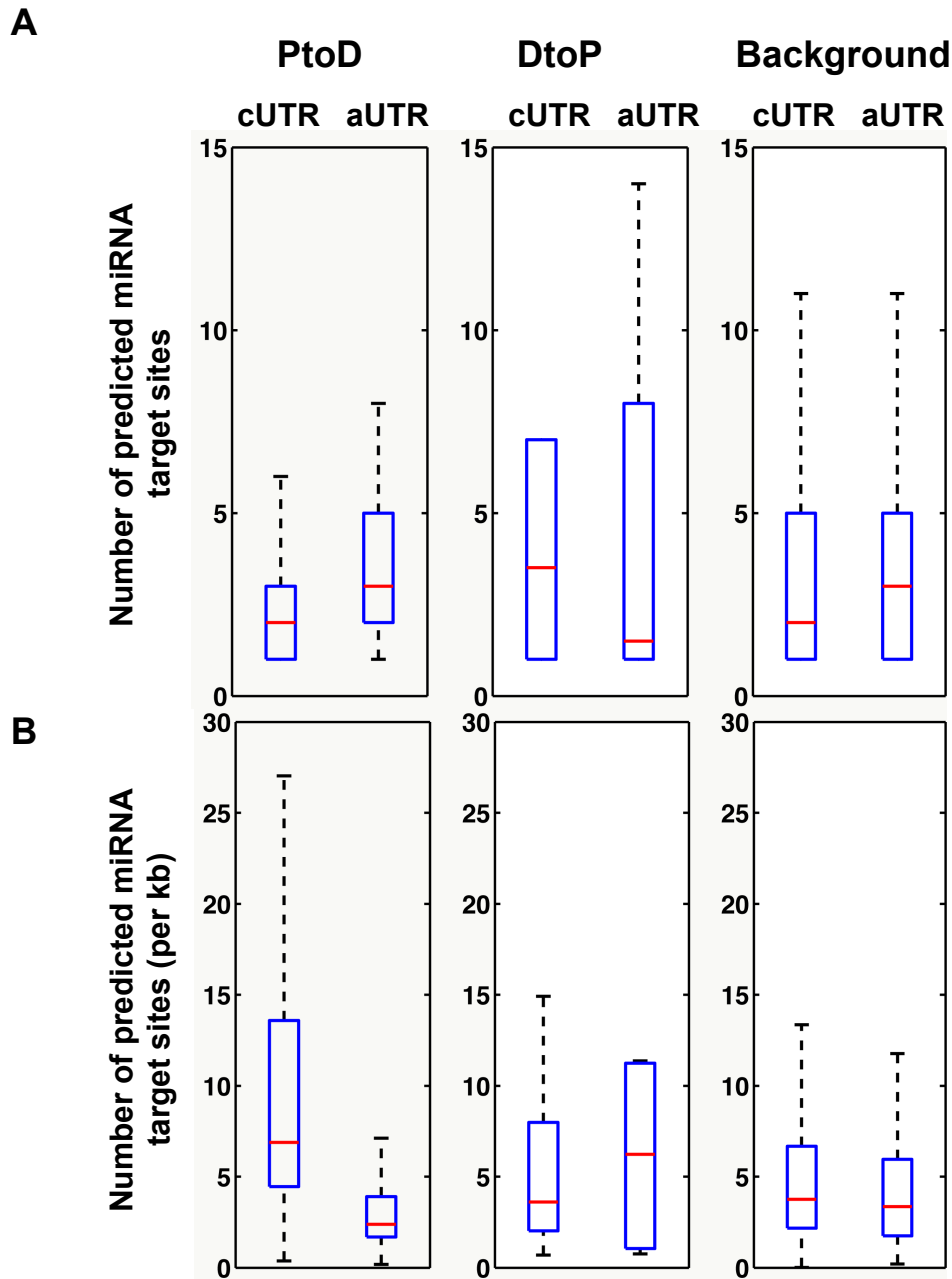

**Figure S31. Influence of Fip1-mediated APA regulation on microRNA targeting.** (A) The total number of predicted microRNA target sites in the cUTR and aUTR of PtoD, DtoP, and background genes. (B) The density (per kb) of predicted microRNA target sites in the cUTR and aUTR of PtoD, DtoP, and background genes.
