# Supplementary material
Source: PubMed Central journal article supplement (PMC4194112)
Supplement: embj0033-0878-sd32.pdf [file embj0033-0878-sd32.pdf]

**Supplementary Table S1.**

Differentially expressed genes in Fip1-depleted cells and overlap with Fip1 APA targets.

| <b>Gene ID</b> | <b>Gene Symbol</b> | <b>Average fold change</b> | <b>Overlap</b> |
|----------------|--------------------|----------------------------|----------------|
| 21991          | Tpi1               | -1.047706248               | YES            |
| 378702         | Serf2              | 1.001627952                | YES            |
| 223601         | Fam49b             | 1.106894477                | YES            |
| 50926          | Hnrpdl             | 1.162428138                | YES            |
| 12572          | Cdk7               | 1.247934314                | YES            |
| 16976          | Lrpap1             | 1.260555725                | YES            |
| 27050          | Rps3               | 1.463983042                | YES            |
| 14792          | Lpcat3             | -2.236758803               | NO             |
| 83560          | Tex14              | -2.162915195               | NO             |
| 69634          | Clybl              | -2.015832236               | NO             |
| 20257          | Stmn2              | -1.964744063               | NO             |
| 225288         | Fhod3              | -1.864259954               | NO             |
| 73677          | Psma8              | -1.815616342               | NO             |
| 68953          | Chmp2a             | -1.727514622               | NO             |
| 54004          | Diap2              | -1.707154809               | NO             |
| 68738          | Acss1              | -1.6814583                 | NO             |
| 66899          | Fip1l1             | -1.620427017               | NO             |
| 66514          | Asrgl1             | -1.607938463               | NO             |
| 70186          | Fam162a            | -1.564679518               | NO             |
| 71778          | Klhl5              | -1.539333801               | NO             |
| 71599          | Senp8              | -1.498608495               | NO             |
| 94352          | Loxl2              | -1.495761756               | NO             |
| 18173          | Slc11a1            | -1.472187033               | NO             |
| 76857          | Spopl              | -1.46440022                | NO             |
| 85031          | Pla1a              | -1.460005109               | NO             |
| 68055          | Atp5s              | -1.448475582               | NO             |
| 320795         | Pkn1               | -1.443191659               | NO             |
| 234309         | Cbr4               | -1.427807386               | NO             |
| 13198          | Ddit3              | -1.392386891               | NO             |
| 68047          | Mpnd               | -1.391037086               | NO             |
| 268566         | Gphn               | -1.37710362                | NO             |
| 227620         | Uap1l1             | -1.358744696               | NO             |
| 17533          | Mrc1               | -1.355349615               | NO             |
| 14874          | Gstz1              | -1.354926507               | NO             |
| 328971         | Spink10            | -1.336115602               | NO             |
| 14686          | Gnat2              | -1.32888643                | NO             |
| 72157          | Pgm2               | -1.326980964               | NO             |
| 245847         | Amdhd2             | -1.320442388               | NO             |

|        |               |              |    |
|--------|---------------|--------------|----|
| 71981  | Tdrd12        | -1.312842064 | NO |
| 76781  | Mettl4        | -1.312734366 | NO |
| 20168  | Rtn3          | -1.310124455 | NO |
| 29811  | Ndrp2         | -1.302452718 | NO |
| 76784  | Mtif2         | -1.297827271 | NO |
| 51798  | Ech1          | -1.296648411 | NO |
| 66757  | Adat2         | -1.293240556 | NO |
| 16774  | Lama3         | -1.277928042 | NO |
| 14453  | Gas2          | -1.275332422 | NO |
| 26422  | Nbea          | -1.273908424 | NO |
| 20431  | Si            | -1.27240063  | NO |
| 71648  | Optn          | -1.268364011 | NO |
| 20913  | Stxbp4        | -1.267857465 | NO |
| 77619  | Preld2        | -1.25344882  | NO |
| 75578  | Fggy          | -1.248984666 | NO |
| 20713  | Serpini1      | -1.24815539  | NO |
| 57896  | Krcc1         | -1.24241074  | NO |
| 68236  | Gtsf1l        | -1.239843841 | NO |
| 80879  | Slc16a3       | -1.234038389 | NO |
| 67578  | Patl2         | -1.213977501 | NO |
| 56615  | Mgst1         | -1.199923735 | NO |
| 21763  | Tex2          | -1.19897212  | NO |
| 15937  | Ier3          | -1.198463619 | NO |
| 78751  | Zc3h6         | -1.197998638 | NO |
| 20341  | Selenbp1      | -1.196697218 | NO |
| 14635  | Galk1         | -1.195729836 | NO |
| 23965  | Odz3          | -1.186640328 | NO |
| 50527  | Ero1l         | -1.184016291 | NO |
| 66487  | 2010107H07Rik | -1.182279868 | NO |
| 73139  | Cenpv         | -1.177687816 | NO |
| 66559  | Metap1        | -1.176580491 | NO |
| 106344 | Rfc4          | -1.175835673 | NO |
| 14734  | Gpc3          | -1.174452123 | NO |
| 236899 | Pcyt1b        | -1.172812507 | NO |
| 83558  | Tex11         | -1.162299932 | NO |
| 14348  | Fut9          | -1.160293993 | NO |
| 71365  | Pdss2         | -1.159766241 | NO |
| 74393  | 4933403G14Rik | -1.158286912 | NO |
| 67419  | 3632451O06Rik | -1.157827273 | NO |
| 56279  | Fam69b        | -1.14628565  | NO |
| 272538 | Tmco7         | -1.141653793 | NO |
| 225283 | Rprd1a        | -1.134747431 | NO |
| 72562  | Pcbd2         | -1.124059436 | NO |
| 229905 | Ccbl2         | -1.117616805 | NO |

|        |               |              |    |
|--------|---------------|--------------|----|
| 69008  | Cab39l        | -1.117244206 | NO |
| 22145  | Tuba4a        | -1.116598749 | NO |
| 320158 | Zmat4         | -1.112889521 | NO |
| 100177 | Zmym6         | -1.11206529  | NO |
| 16795  | Large         | -1.111155506 | NO |
| 20893  | Bhlhe40       | -1.107135258 | NO |
| 226539 | Dars2         | -1.102652462 | NO |
| 208718 | Dis3l2        | -1.102398377 | NO |
| 17133  | Maff          | -1.102031089 | NO |
| 69726  | Smyd3         | -1.099520271 | NO |
| 66790  | Grtp1         | -1.098252645 | NO |
| 26897  | Acot1         | -1.096939218 | NO |
| 230654 | Lrrc41        | -1.095349702 | NO |
| 74388  | Dpp8          | -1.091162682 | NO |
| 67101  | 2310039H08Rik | -1.087916265 | NO |
| 76917  | Flywch2       | -1.085384596 | NO |
| 11676  | Aldoc         | -1.083851426 | NO |
| 14872  | Gstt2         | -1.0734466   | NO |
| 67091  | Trappc6a      | -1.073362367 | NO |
| 56277  | Tmem45a       | -1.070962252 | NO |
| 72322  | Xpo5          | -1.067075965 | NO |
| 244049 | Mctp2         | -1.066110248 | NO |
| 75516  | Ttc32         | -1.061935943 | NO |
| 102093 | Phkb          | -1.061287729 | NO |
| 110821 | Pcca          | -1.060066473 | NO |
| 68514  | Efha1         | -1.059816068 | NO |
| 57258  | Xpo4          | -1.058975836 | NO |
| 107227 | MacroD1       | -1.051642399 | NO |
| 67664  | Rnf125        | -1.050911366 | NO |
| 66277  | Klf15         | -1.048788269 | NO |
| 66333  | Aqp11         | -1.043618045 | NO |
| 241035 | Pkhd1         | -1.040338665 | NO |
| 77634  | Snopc3        | -1.038597004 | NO |
| 241070 | Gpr1          | -1.033028999 | NO |
| 27369  | Dguok         | -1.031643339 | NO |
| 19337  | Rab33a        | -1.030546172 | NO |
| 13528  | Dtnb          | -1.029747315 | NO |
| 67905  | Ppm1m         | -1.028568257 | NO |
| 14696  | Gnb4          | -1.025162828 | NO |
| 67899  | Cmc1          | -1.022504822 | NO |
| 66706  | Ndufaf3       | -1.020901625 | NO |
| 108853 | Mtrf1l        | -1.019362079 | NO |
| 75452  | Ascc2         | -1.016354633 | NO |
| 68015  | Trap1         | -1.012782945 | NO |

|        |               |              |    |
|--------|---------------|--------------|----|
| 68631  | Cryl1         | -1.011420367 | NO |
| 56421  | Pfkp          | -1.010573126 | NO |
| 66469  | 2810405K02Rik | -1.00980792  | NO |
| 219094 | Khbyn         | -1.009022953 | NO |
| 68774  | Ms4a6d        | -1.004503101 | NO |
| 66720  | Klhl10        | -1.003427482 | NO |
| 13813  | Eomes         | 1.004511133  | NO |
| 71602  | Myo1e         | 1.013413774  | NO |
| 11504  | Adamts1       | 1.018994597  | NO |
| 29877  | Hdgfrp3       | 1.023009072  | NO |
| 231510 | Agpat9        | 1.026363357  | NO |
| 237500 | Tmtc3         | 1.050126254  | NO |
| 212933 | Pm20d1        | 1.050324422  | NO |
| 73284  | Ddit4l        | 1.063294267  | NO |
| 11752  | Anxa8         | 1.065636952  | NO |
| 18669  | Abcb1b        | 1.06979721   | NO |
| 231440 | Parm1         | 1.070126458  | NO |
| 319527 | B230325K18Rik | 1.070326158  | NO |
| 68797  | Pdgfrl        | 1.080441292  | NO |
| 75723  | Amotl1        | 1.088004943  | NO |
| 235180 | Fez1          | 1.095311364  | NO |
| 238076 | Kcns3         | 1.111165284  | NO |
| 13136  | Cd55          | 1.1179104    | NO |
| 13482  | Dpp4          | 1.118427704  | NO |
| 16904  | Gzmm          | 1.121697168  | NO |
| 56491  | Vapb          | 1.131528696  | NO |
| 13805  | Eng           | 1.139530862  | NO |
| 239083 | Ccnb1ip1      | 1.14055763   | NO |
| 57279  | Slc25a20      | 1.142723268  | NO |
| 74437  | 4933402E13Rik | 1.145306053  | NO |
| 110648 | Lmx1a         | 1.149677278  | NO |
| 11828  | Aqp3          | 1.151797729  | NO |
| 19934  | Rpl22         | 1.152602362  | NO |
| 217012 | Unc45b        | 1.153701806  | NO |
| 12832  | Col5a2        | 1.155755386  | NO |
| 20616  | Snap91        | 1.164720827  | NO |
| 27226  | Pla2g7        | 1.174006556  | NO |
| 17130  | Smad6         | 1.175701292  | NO |
| 67168  | Lpar6         | 1.187596054  | NO |
| 68016  | Murc          | 1.191210393  | NO |
| 232023 | Vopp1         | 1.202792191  | NO |
| 20227  | Sart1         | 1.207009887  | NO |
| 15904  | Id4           | 1.207907368  | NO |
| 109624 | Cald1         | 1.224941225  | NO |

|        |               |             |    |
|--------|---------------|-------------|----|
| 56213  | Htra1         | 1.23054666  | NO |
| 17035  | Lxn           | 1.235163971 | NO |
| 72723  | Zfp74         | 1.261801124 | NO |
| 217333 | Trim47        | 1.264324371 | NO |
| 12514  | Cd68          | 1.268137056 | NO |
| 22418  | Wnt5a         | 1.288241656 | NO |
| 16476  | Jun           | 1.304840003 | NO |
| 16952  | Anxa1         | 1.341812713 | NO |
| 434377 | Zfp560        | 1.348812164 | NO |
| 56741  | Igdcc4        | 1.360912235 | NO |
| 16526  | Kcnk2         | 1.361456272 | NO |
| 69327  | 1700007K13Rik | 1.366241814 | NO |
| 208982 | Hmgcll1       | 1.371778634 | NO |
| 14181  | Fgfbp1        | 1.398678077 | NO |
| 20166  | Rtkn          | 1.42775991  | NO |
| 12444  | Ccnd2         | 1.432672648 | NO |
| 245423 | Gm364         | 1.43837449  | NO |
| 12683  | Cidea         | 1.439079845 | NO |
| 20971  | Sdc4          | 1.441741106 | NO |
| 16007  | Cyr61         | 1.456275304 | NO |
| 11910  | Atf3          | 1.492830996 | NO |
| 14531  | Gcm1          | 1.495875564 | NO |
| 14121  | Fbp1          | 1.500464521 | NO |
| 227960 | Gca           | 1.50183377  | NO |
| 235493 | BC031353      | 1.50595693  | NO |
| 216021 | Stox1         | 1.547009425 | NO |
| 93765  | Ube2n         | 1.574630772 | NO |
| 622434 | 4631416L12Rik | 1.579947711 | NO |
| 11555  | Adrb2         | 1.587458671 | NO |
| 385493 | AU015836      | 1.759708468 | NO |
| 69549  | 2310009B15Rik | 1.770948171 | NO |
| 64058  | Perp          | 1.826880312 | NO |
| 236537 | Zfp352        | 1.83657809  | NO |
| 21664  | Phlda1        | 1.842228119 | NO |
| 244608 | Ccdc113       | 1.923083905 | NO |
| 11991  | Hnrnpd        | 1.947631394 | NO |
| 14120  | Fbp2          | 1.999566815 | NO |
| 12955  | Cryab         | 2.177754849 | NO |
| 20024  | Sub1          | 1.035986707 | NO |
| 64934  | Pes1          | 1.060858219 | NO |
| 16785  | Rpsa          | 1.269514027 | NO |
| 67115  | Rpl14         | 1.558975889 | NO |
| 19933  | Rpl21         | 1.786194924 | NO |
| 56455  | Dynll1        | 2.464652085 | NO |

|           |               |              |    |
|-----------|---------------|--------------|----|
| 73490     | Mipol1        | -1.865952775 | NO |
| 74319     | 1110005A03Rik | -1.716488695 | NO |
| 237246    | BC022960      | -1.590153165 | NO |
| 13417     | Dnahc8        | -1.516213546 | NO |
| 67522     | 1700097N02Rik | -1.444587894 | NO |
| 66359     | Fam36a        | -1.407840041 | NO |
| 14466     | Gba           | -1.323613449 | NO |
| 18784     | Pla2g5        | -1.309720417 | NO |
| 106740    | LOC106740     | -1.301307164 | NO |
| 242484    | D630039A03Rik | -1.255454128 | NO |
| 100503788 | n/a           | -1.187756797 | NO |
| 226026    | Smc5          | -1.159684049 | NO |
| 75801     | 4930447C04Rik | -1.132156422 | NO |
| 672498    | Gm9564        | -1.121554741 | NO |
| 66275     | n/a           | -1.100368288 | NO |
| 73708     | Dppa3         | -1.087681873 | NO |
| 192976    | BC046404      | -1.082026544 | NO |
| 57742     | Abhd1         | -1.023062296 | NO |
| 654824    | Ankrd37       | -1.020133103 | NO |
| 77358     | 9430069I07Rik | -1.002300415 | NO |
| 14105     | Srsf10        | 1.018722085  | NO |
| 100043601 | n/a           | 1.020688957  | NO |
| 668059    | Gm8953        | 1.043153299  | NO |
| 239552    | Apol8         | 1.044741215  | NO |
| 13665     | Eif2s1        | 1.061603707  | NO |
| 57444     | Isg20         | 1.063320343  | NO |
| 12258     | Serping1      | 1.075149562  | NO |
| 277010    | Marveld1      | 1.091815538  | NO |
| 15077     | Hist2h3c1     | 1.097442193  | NO |
| 16372     | Irx2          | 1.145176136  | NO |
| 76815     | Calcoco2      | 1.162592167  | NO |
| 18530     | Pcdh8         | 1.203758383  | NO |
| 70757     | Ptplb         | 1.268381204  | NO |
| 217122    | Gm11545       | 1.270630049  | NO |
| 20220     | Sap18         | 1.283441098  | NO |
| 100503774 | n/a           | 1.317187786  | NO |
| 66712     | Spesp1        | 1.353806642  | NO |
| 20104     | Rps6          | 1.38137617   | NO |
| 546118    | Ubtfl1        | 1.4094914    | NO |
| 100502591 | n/a           | 1.420805361  | NO |
| 666806    | Gm8300        | 1.424104698  | NO |
| 245350    | AA414768      | 1.428348192  | NO |
| 12151     | Bmi1          | 1.530122543  | NO |
| 381845    | 2310014L17Rik | 1.610049065  | NO |

|           |          |             |    |
|-----------|----------|-------------|----|
| 100504500 | n/a      | 1.631516131 | NO |
| 15586     | Hyal1    | 1.632037998 | NO |
| 50708     | Hist1h1c | 1.671173585 | NO |
| 267019    | Rps15a   | 2.030057482 | NO |
| 12116     | Bhmt     | 2.087108118 | NO |
| 100503670 | n/a      | 2.159033137 | NO |
| 432591    | Gm11544  | 2.231961578 | NO |
| 15375     | Foxa1    | 2.300220172 | NO |
| 97165     | Hmgb2    | 2.656231638 | NO |
| 11951     | Atp5g1   | 2.841588999 | NO |
