# Supplementary material
Source: PubMed Central journal article supplement (PMC4194112)
Supplement: embj0033-0878-sd33.pdf [file embj0033-0878-sd33.pdf]

**Supplemental Table S2.**

Overlap between Fip1 PtoD APA targets and putative self-renewal factors identified by previous RNAi screens.

| <b>Fip1 APA PtoD Genes</b> |                |                |
|----------------------------|----------------|----------------|
| <b>Gene Symbol</b>         | <b>Gene ID</b> | <b>Overlap</b> |
| Cul3                       | 26554          | YES            |
| Eif4g2                     | 13690          | YES            |
| Ncaph2                     | 52683          | YES            |
| Nampt                      | 59027          | YES            |
| Rbx1                       | 100043674      | YES            |
| Ncl                        | 17975          | YES            |
| Mtch2                      | 100039506      | YES            |
| Pcna                       | 18538          | YES            |
| Pole4                      | 66979          | YES            |
| Cnot1                      | 620499         | YES            |
| Mrpl55                     | 67212          | YES            |
| 2410015M20Rik              | 224904         | YES            |
| Sf3b1                      | 81898          | YES            |
| Tcp1                       | 21454          | YES            |
| Calm3                      | 665672         | YES            |
| Atp2a2                     | 11938          | YES            |

| <b>RNAi screen hits</b>     |                               |                                  |
|-----------------------------|-------------------------------|----------------------------------|
| <b>Hu et al Screen Hits</b> | <b>Ding et al Screen Hits</b> | <b>Farzzio et al Screen Hits</b> |
| ADK                         | ADK                           | Mbd3                             |
| APC                         | APC                           | Rnf2                             |
| Cpsf3                       | CCNK                          | Smc1a                            |
| Ctr9                        | CNOT1                         | Tcp1                             |
| Fip111                      | CPSF3                         | Trim28                           |
| Iws1                        | CTR9                          | Stat3                            |
| Mcrs1                       | FIP1L1                        | Aqr                              |
| Ncapg2                      | GUCY1A3                       | Arid1a                           |
| Pcid2                       | Hmcn2                         | Arid4a                           |
| POU5F1                      | HSPB7                         | Brca1                            |
| Rif1                        | IMPAD1                        | Brd4                             |
| Rmnd5a                      | IWS1                          | Cbx3                             |
| Rnf2                        | KLC3                          | Cdc5l                            |
| Setd1b                      | MCRS1                         | Chaf1b                           |
| SOX2                        | Med14                         | Ddx18                            |

|               |               |          |
|---------------|---------------|----------|
| Wdr61         | NCAPG2        | Ddx19a   |
| YY1           | PCID2         | Ddx39    |
| EP300         | Pou5f1        | Ddx41    |
| Rexo1         | RIF1          | Ddx47    |
| MBD3          | RMND5A        | Ddx54    |
| Smc1a         | RNF2          | Ddx56    |
| TRIM28        | SETD1B        | Dhx15    |
| CNOT3         | SHFM1         | Dhx37    |
| Eif2s3x       | SOX2          | Dhx8     |
| Eif4a1        | WDR61         | Dmap1    |
| Epdr1         | Stat3         | Eif4a3   |
| Nipbl         | 0610030E20RIK | Ep400    |
| Paf1          | 1110014J01RIK | Gmn      |
| Pcgf6         | 1190002H23RIK | Grid2    |
| RAD21         | 1200016B10RIK | H2afz    |
| RBX1          | 1700001J04Rik | Ighmbp2  |
| Rfwd2         | 1700001K23RIK | Ino80    |
| 2610304G08Rik | 1700009P17RIK | Insl6    |
| ALDOA         | 1700081L11RIK | Ints4    |
| Atox1         | 2210013O21RIK | Kat5     |
| Cpsf1         | 2310002J15RIK | Lsm2     |
| Cpsf2         | 2410015M20RIK | Lsm7     |
| Dazap1        | 2610100L16RIK | Mcm2     |
| Ehmt1         | 2700059D21RIK | Mcm4     |
| Eif4g2        | 2810006K23RIK | Mcm6     |
| Eny2          | 2900042B11RIK | Mcm7     |
| Hira          | 3110003A22RIK | Mettl5   |
| IL6ST         | 4930563E22RIK | Phf5a    |
| Ing5          | 4933403F05RIK | Ruvbl1   |
| Krtap21-1     | 5330431K02RIK | Ruvbl2   |
| Mga           | 5830408B19RIK | Setd8    |
| Ncaph2        | 9030425L15RIK | Sf3b1    |
| NCOA3         | 9330182L06RIK | Sin3a    |
| NEDD8         | AASDH         | Skiv2l2  |
| Nup188        | ACACA         | Smarca4  |
| Olf114        | ACADSB        | Smarcc1  |
| Olf1887       | ACOT11        | Smc2     |
| Pcbp1         | ACSM2         | Smc4     |
| 2610015J01Rik | Adat3         | Snrnp200 |
| Spesp1        | AHNAK         | Snrpd1   |
| Spire1        | A1115009      | Snrpd2   |

|               |               |         |
|---------------|---------------|---------|
| Sprr2i        | AI836003      | Snrpd3  |
| Trim16        | ANGPT1        | Snrpe   |
| Xpo7          | ANKRD12-LIKE  | Snrpf   |
| Mtch2         | ARHGEF18      | Snrpg   |
| 1110020P15Rik | ARL8A         | Snrpn   |
| 1500035H01Rik | ARMC9         | Sp1     |
| 1700067P10Rik | Ascc1         | Ssrp1   |
| 3110070M22Rik | ATN1          | Supt16h |
| 5430407P10Rik | ATP2A2        | Trrap   |
| Acox1         | ATP2C1        | Utp3    |
| Amot          | ATP6V0A1      | Yeats4  |
| Atg3          | AUH           | Zcchc4  |
| Bcl2l12       | B130055M24RIK |         |
| CBX1          | B230342M21RIK |         |
| Ccrn4l        | B430203M17RIK |         |
| CDK9          | B930053N05RIK |         |
| Cdkn2aip      | BACH2         |         |
| GM1959        | BC018507      |         |
| Cnih3         | BC031353      |         |
| Coq3          | BCAM          |         |
| CUL3          | BCL9L         |         |
| CXCL9         | BCORL1        |         |
| D630039A03Rik | BECN1         |         |
| Dab2ip        | C76472        |         |
| Ear11         | CALM3         |         |
| ECEL1         | CCDC15        |         |
| Elof1         | CCDC56        |         |
| EYA1          | CCNY          |         |
| EYA2          | CD180         |         |
| Fbxl8         | CDH13         |         |
| Fry           | CDH4          |         |
| GALE          | CEP350        |         |
| GGH           | CHRM3         |         |
| Golga7        | CIITA         |         |
| Grk6          | CLDN7         |         |
| HLA-DPA1      | CLP1          |         |
| Hao1          | CPEB4         |         |
| Hist1h3i      | CREG1         |         |
| HNRPUL1       | CTDSPL        |         |
| HOXA7         | Cux1          |         |
| HTATIP2       | CXXC1         |         |
| Ii20          | CYBASC3       |         |
| Znhit4        | D14Ert16e     |         |

|               |               |  |
|---------------|---------------|--|
| Ccdc95        | D16WSU119E    |  |
| MAPK14        | D3ERTD300E    |  |
| Med10         | D630023F18RIK |  |
| Metap2        | D630028G08RIK |  |
| MS4A6B        | D7ERTD128E    |  |
| NTS           | DRD2          |  |
| Olf100        | DUSP3         |  |
| 4930415J05Rik | Efr3b         |  |
| Olf380        | EG214321      |  |
| Olf954        | EIF4E         |  |
| OSTF1         | ELL2          |  |
| P4ha3         | ERAF          |  |
| Pax7          | ETV1          |  |
| PCNA          | FASTKD3       |  |
| PECI          | FBP2          |  |
| Piwil4        | FBXO5         |  |
| Plac1         | FMO1          |  |
| Pole4         | FOXP1         |  |
| PPP4C         | FOXP3         |  |
| Rnf146        | Fscn1         |  |
| Samd11        | FZD10         |  |
| Samd5         | Glis3         |  |
| Sema4a        | GM47          |  |
| Sgsm3         | GMPS          |  |
| Slc16a11      | GPC6          |  |
| Slc19a3       | Gpr137c       |  |
| Spag7         | GPT1          |  |
| Ssu72         | HAGH          |  |
| 1700095N21RIK | HARS          |  |
| Syng1         | HIPK1         |  |
| Syt13         | Hopx          |  |
| Tekt1         | HOXC9         |  |
| TGFB1         | HTRA1         |  |
| 5730409G07RIK | IFT122        |  |
| Thoc5         | IGFBP3        |  |
| Triap1        | IGSF5         |  |
| Trmt6         | IL20RB        |  |
| TUBD1         | INA           |  |
| UBE1X         | IRAK1BP1      |  |
| Uncx4.1       | IVD           |  |
| Vamp2         | JARID1A       |  |
| Zadh2         | JPH4          |  |
| Zfp13         | KCNH1         |  |
| Zfp219        | KCNIP4        |  |

|               |           |  |
|---------------|-----------|--|
| A930006D11Rik | KIF11     |  |
| Zfp628        | LAPTM5    |  |
| Zfp759        | Lifr      |  |
| Zfp771        | LIN54     |  |
| Zfp786        | LOC230628 |  |
|               | LOC638275 |  |
|               | LSM10     |  |
|               | LY9       |  |
|               | LYL1      |  |
|               | MAP3K7IP3 |  |
|               | MARCKSL1  |  |
|               | MDGA2     |  |
|               | MFSD2     |  |
|               | MGAT1     |  |
|               | MKKS      |  |
|               | MRPL38    |  |
|               | MRPL55    |  |
|               | MRPS30    |  |
|               | MUM1L1    |  |
|               | MYH9      |  |
|               | MYLC2PL   |  |
|               | NCL       |  |
|               | NDUFS2    |  |
|               | NFYA      |  |
|               | Nova1     |  |
|               | NPC2      |  |
|               | NPHP4     |  |
|               | NUDT18    |  |
|               | NUDT3     |  |
|               | PAG1      |  |
|               | PARP6     |  |
|               | PBEF1     |  |
|               | PCBD1     |  |
|               | PCLO      |  |
|               | PDE4A     |  |
|               | PDK1      |  |
|               | PDK3      |  |
|               | pdlim2    |  |
|               | PHF23     |  |
|               | PHR1      |  |
|               | PIK3CA    |  |
|               | PLEKHG1   |  |

|  |               |  |
|--|---------------|--|
|  | PLRG1         |  |
|  | PNCK          |  |
|  | PPM1L         |  |
|  | PPP2R5E       |  |
|  | Ppp4r2        |  |
|  | PPTC7         |  |
|  | PRKAG1        |  |
|  | PRKCZ         |  |
|  | PRMT8         |  |
|  | PRPF40B       |  |
|  | PTBP1         |  |
|  | RAD51         |  |
|  | RBM6          |  |
|  | RERE          |  |
|  | RG9MTD2       |  |
|  | RHOC          |  |
|  | RHOG          |  |
|  | RLF           |  |
|  | RNF20         |  |
|  | RP23-143A14.5 |  |
|  | RP9           |  |
|  | RPA3          |  |
|  | RTF1          |  |
|  | SAFB          |  |
|  | SCGN          |  |
|  | SFRP4         |  |
|  | SIX6OS1       |  |
|  | SLAIN1        |  |
|  | SLAIN2        |  |
|  | SLC22A18      |  |
|  | SLC25A25      |  |
|  | SLC25A35      |  |
|  | SMEK1         |  |
|  | Socs4         |  |
|  | SOS1          |  |
|  | SPRED2        |  |
|  | ST8SIA4       |  |
|  | STAG1         |  |
|  | STAT5A        |  |
|  | STOML3        |  |
|  | SYPL          |  |
|  | TBC1D5        |  |

|  |               |  |
|--|---------------|--|
|  | THBS3         |  |
|  | THOC1         |  |
|  | THOC2         |  |
|  | TMEM33        |  |
|  | TMEM4         |  |
|  | TMEM52        |  |
|  | TRAPPC6A      |  |
|  | TSGA14        |  |
|  | TSHB          |  |
|  | TSPYL4        |  |
|  | TTC18         |  |
|  | TXNIP         |  |
|  | UBE2M         |  |
|  | UBOX5         |  |
|  | USP19         |  |
|  | USP31         |  |
|  | VANGL1        |  |
|  | VTI1A         |  |
|  | WDR5          |  |
|  | WDR59         |  |
|  | WNK1          |  |
|  | XPNPEP3       |  |
|  | XPO4          |  |
|  | ZBTB20        |  |
|  | ZBTB37        |  |
|  | ZFP110        |  |
|  | Nampt         |  |
|  | Ilf3          |  |
|  | Liph          |  |
|  | Fam48a        |  |
|  | Dph1          |  |
|  | Med31         |  |
|  | Safb2         |  |
|  | Rrp7a         |  |
|  | Gpt           |  |
|  | Insl3         |  |
|  | 1700020K04Rik |  |
|  | Oog3          |  |
|  | C230076A16Rik |  |
|  | Zfp689        |  |
|  | Ubxn2b        |  |
|  | Plekhb1       |  |
|  | Gm4787        |  |
|  | Pgap2         |  |

|  |               |  |
|--|---------------|--|
|  | Kdm5a         |  |
|  | Csrp3         |  |
|  | Wnk4          |  |
|  | AA545190      |  |
|  | Cd22          |  |
|  | Tmem138       |  |
|  | Ankrd12       |  |
|  | Myl10         |  |
|  | D130020L05Rik |  |
|  | Cnpy2         |  |
|  | Gchfr         |  |
|  | Map3k7        |  |
|  | N4bp2l1       |  |
|  | Calm1         |  |
|  | Mfn2          |  |
|  | Nfix          |  |
|  | Pappa         |  |
|  | Pik3r1        |  |
|  | Pcdh9         |  |
|  | Tcf12         |  |
|  | Fzd2          |  |
|  | Mfsd2a        |  |
|  | 5033414K04Rik |  |
