# Supplementary material
Source: PubMed Central journal article supplement (PMC4194112)
Supplement: embj0033-0878-sd34.pdf [file embj0033-0878-sd34.pdf]

**Supplementary Table S3.**

Overlap between Fip1 APA targets and genes that show significant APA changes during reprogramming of MEF.

| <b>Fip1 APA P2D Genes</b> |           |         |
|---------------------------|-----------|---------|
| Symbol                    | GeneID    | Overlap |
| Cox4nb                    | 18117     | YES     |
| Csnk1d                    | 104318    | YES     |
| Cggbp1                    | 106143    | YES     |
| Tial1                     | 21843     | YES     |
| Rbx1                      | 100043674 | YES     |
| Gnb1                      | 14688     | YES     |
| Anxa7                     | 11750     | YES     |
| Sf3b1                     | 81898     | YES     |
| Sbno1                     | 243272    | YES     |
| Strap                     | 20901     | YES     |
| Gmfb                      | 63985     | YES     |
| Seh1l                     | 72124     | YES     |
| Reep5                     | 13476     | YES     |
| Aasdhpt                   | 67618     | YES     |
| Nolc1                     | 70769     | YES     |
| Kpnb1                     | 16211     | YES     |
| Lmnb1                     | 16906     | YES     |
| Dnajc11                   | 230935    | YES     |
| Leprotl1                  | 68192     | YES     |
| Etf1                      | 225363    | YES     |
| Mrpl49                    | 18120     | YES     |
| Serf2                     | 378702    | YES     |
| Ccnd1                     | 12443     | YES     |
| Ddx49                     | 234374    | YES     |
| Arfrp1                    | 76688     | YES     |
| Tmpo                      | 21917     | YES     |
| Rras2                     | 66922     | YES     |
| Ssb                       | 20823     | YES     |
| Rngtt                     | 24018     | YES     |
| Chmp4b                    | 75608     | YES     |
| Sys1                      | 66460     | YES     |
| Tmem183a                  | 57439     | YES     |
| Stt3b                     | 68292     | YES     |
| Dlat                      | 235339    | YES     |
| Ccnh                      | 66671     | YES     |
| Lancl1                    | 14768     | YES     |
| Poldip2                   | 67811     | YES     |
| Rpl21                     | 100040508 | YES     |

|        |       |     |
|--------|-------|-----|
| Rad23b | 19359 | YES |
| Nudt1  | 17766 | YES |

| <b>MEF to iPS APA genes</b> |               |                                                       |
|-----------------------------|---------------|-------------------------------------------------------|
| <b>Symbol</b>               | <b>GeneID</b> | <b>MEF vs iPS relative usage of distal polyA site</b> |
| Mbnl3                       | 171170        | -2.134994591                                          |
| Socs5                       | 56468         | -1.797974187                                          |
| Cox4nb                      | 18117         | -1.526118453                                          |
| Tmem33                      | 67878         | -1.42111911                                           |
| E430028B21Rik               | 211948        | -1.412857984                                          |
| Gatad2a                     | 234366        | -1.365499062                                          |
| Cggbp1                      | 106143        | -1.355426123                                          |
| Btrc                        | 12234         | -1.351576148                                          |
| Cyb5b                       | 66427         | -1.346102852                                          |
| Thap1                       | 73754         | -1.344462592                                          |
| Slc39a3                     | 106947        | -1.338814022                                          |
| Gosr1                       | 53334         | -1.318257251                                          |
| Mras                        | 17532         | -1.313686334                                          |
| Trim37                      | 68729         | -1.295936905                                          |
| Lmnb1                       | 16906         | -1.229601581                                          |
| Fbxl20                      | 72194         | -1.219033163                                          |
| Fubp3                       | 320267        | -1.165217542                                          |
| Hivep1                      | 110521        | -1.147315142                                          |
| Sbno1                       | 243272        | -1.144012196                                          |
| Sephs1                      | 109079        | -1.123458822                                          |
| Prpf4                       | 70052         | -1.0766181                                            |
| Reep5                       | 13476         | -1.070863804                                          |
| 6330578E17Rik               | 76178         | -1.043120289                                          |
| Btaf1                       | 107182        | -1.040198711                                          |
| Ints12                      | 71793         | -1.030516378                                          |
| Arpp19                      | 59046         | -1.02955236                                           |
| Napa                        | 108124        | -1.007390947                                          |
| Mtmr4                       | 170749        | -0.985435578                                          |
| Strap                       | 20901         | -0.974357886                                          |
| Ssbp1                       | 381760        | -0.971454792                                          |
| Chpt1                       | 212862        | -0.97080801                                           |
| D4Erttd22e                  | 213491        | -0.940558184                                          |
| Ube2i                       | 22196         | -0.932717787                                          |
| Ctdsp2                      | 52468         | -0.918815278                                          |
| Rbx1                        | 56438         | -0.900626361                                          |
| Csnk1d                      | 104318        | -0.884823924                                          |
| Bcr                         | 110279        | -0.880997117                                          |

|               |        |              |
|---------------|--------|--------------|
| Rnf138        | 56515  | -0.876435109 |
| Col5a1        | 12831  | -0.804519114 |
| Ccng1         | 12450  | -0.792456537 |
| Gsk3b         | 56637  | -0.781136115 |
| Fbxo28        | 67948  | -0.773710149 |
| Sept8         | 20362  | -0.770759699 |
| 2700050L05Rik | 214764 | -0.764343849 |
| Eif5a2        | 208691 | -0.758300371 |
| 2810003C17Rik | 108897 | -0.727697377 |
| Scyl3         | 240880 | -0.696097856 |
| Seh1l         | 72124  | -0.677474297 |
| Dnmt3a        | 13435  | -0.642426752 |
| Leprotl1      | 68192  | -0.639389208 |
| Dnajc11       | 230935 | -0.633620972 |
| Ccnc          | 51813  | -0.632184064 |
| Ubx2          | 67812  | -0.631114911 |
| Rfxap         | 170767 | -0.631075499 |
| Serpini1      | 20713  | -0.623590092 |
| Nutf2         | 68051  | -0.6038508   |
| Stox2         | 71069  | -0.599437216 |
| 4933439F18Rik | 66771  | -0.593158183 |
| Cyld          | 74256  | -0.583940911 |
| Map1lc3b      | 67443  | -0.573992673 |
| Nudt4         | 71207  | -0.541780638 |
| Ccdc127       | 67433  | -0.538834478 |
| Ccdc86        | 108673 | -0.535287082 |
| Kcmf1         | 74287  | -0.53057898  |
| Zmym5         | 219105 | -0.527831812 |
| Zfp294        | 78913  | -0.509035958 |
| Hook3         | 320191 | -0.488406878 |
| Sft2d2        | 108735 | -0.484687308 |
| Scd1          | 20249  | -0.480418749 |
| Gnb1          | 14688  | -0.476878841 |
| Atmin         | 234776 | -0.471461792 |
| Pitpnc1       | 71795  | -0.461310821 |
| Lnp           | 69605  | -0.458210933 |
| Ube2l3        | 22195  | -0.444978896 |
| Pank3         | 211347 | -0.44082429  |
| Marcks        | 17118  | -0.436482486 |
| Tmem106b      | 71900  | -0.427721614 |
| Dctn4         | 67665  | -0.427666131 |
| Wdr68         | 71833  | -0.423263816 |
| Map4k5        | 399510 | -0.414929726 |
| Tial1         | 21843  | -0.413776647 |

|               |        |              |
|---------------|--------|--------------|
| Dclre1b       | 140917 | -0.410466824 |
| E2f3          | 13557  | -0.409120233 |
| Trps1         | 83925  | -0.383588373 |
| Lztf11        | 93730  | -0.378654088 |
| Zfand3        | 21769  | -0.376392538 |
| Zfp650        | 68795  | -0.374097879 |
| Ogfr11        | 70155  | -0.37022103  |
| Gcap14        | 72972  | -0.363676855 |
| Mcl1          | 17210  | -0.356076216 |
| Zrsr2         | 22184  | -0.342129373 |
| Eya3          | 14050  | -0.342119673 |
| Hsd12         | 72479  | -0.337082614 |
| 1600012H06Rik | 67912  | -0.335816396 |
| Bdh1          | 71911  | -0.314382298 |
| Nufip2        | 68564  | -0.306638355 |
| Tm9sf3        | 107358 | -0.305764811 |
| Anxa7         | 11750  | -0.295126062 |
| Kpnb1         | 16211  | -0.287023089 |
| Gmfb          | 63985  | -0.263763418 |
| Centg2        | 347722 | -0.243413538 |
| Sf3b1         | 81898  | -0.217872814 |
| Aasdhppt      | 67618  | -0.212319366 |
| Nup50         | 18141  | -0.207656998 |
| Pdzd8         | 107368 | -0.166981824 |
| Trip12        | 14897  | -0.158320789 |
| Ankle2        | 71782  | -0.104273968 |
| Timp2         | 21858  | -0.098068005 |
| Rbm28         | 68272  | -0.077995003 |
| Arf6          | 11845  | -0.061277731 |
| Nolc1         | 70769  | -0.030669581 |
| Fbxo42        | 213499 | -0.029297505 |
| Sf3a1         | 67465  | -0.968002971 |
| Creg1         | 433375 | -0.95334763  |
| Tbc1d1        | 57915  | -0.916071438 |
| Rnps1         | 19826  | -0.892920557 |
| Preb          | 50907  | -0.875792134 |
| Nhp2l1        | 20826  | -0.832163555 |
| Fbxo21        | 231670 | -0.807151272 |
| Them4         | 75778  | -0.793759865 |
| Myadm         | 50918  | -0.780372662 |
| Ctnnbip1      | 67087  | -0.774908753 |
| Idh3a         | 67834  | -0.770253561 |
| Pcnx          | 54604  | -0.769218096 |
| 2410014A08Rik | 109154 | -0.767819821 |

|           |        |              |
|-----------|--------|--------------|
| Ddx49     | 234374 | -0.762526024 |
| D11Wsu99e | 28081  | -0.747170369 |
| Ccnd1     | 12443  | -0.736708208 |
| Ccnh      | 66671  | -0.732946766 |
| Dixdc1    | 330938 | -0.722075881 |
| Lancl1    | 14768  | -0.720451216 |
| Rngtt     | 24018  | -0.718852303 |
| Serf2     | 378702 | -0.714439795 |
| Eif1ad    | 69860  | -0.708946933 |
| Npc2      | 67963  | -0.687402733 |
| Ssb       | 20823  | -0.686443537 |
| Eif2s3x   | 26905  | -0.686441173 |
| Tmem103   | 72341  | -0.6711992   |
| Hnrnpf    | 98758  | -0.670640675 |
| Tbcc      | 72726  | -0.668030346 |
| Sfrs12    | 218543 | -0.64761231  |
| Strbp     | 20744  | -0.642709873 |
| Stag1     | 20842  | -0.639541668 |
| Ube4b     | 63958  | -0.637585065 |
| Atp8a1    | 11980  | -0.636695391 |
| Jun       | 16476  | -0.628667107 |
| Gng12     | 14701  | -0.610385317 |
| BC037112  | 231128 | -0.592221726 |
| Nudcd2    | 52653  | -0.590442774 |
| Med28     | 66999  | -0.581494483 |
| Rpp14     | 67053  | -0.558997392 |
| Rac1      | 19353  | -0.558253007 |
| Zfyve27   | 319740 | -0.550944878 |
| Ube2q1    | 70093  | -0.547579277 |
| Mgea5     | 76055  | -0.517586282 |
| Etf1      | 225363 | -0.498617295 |
| Mtpn      | 14489  | -0.49737045  |
| Zbtb24    | 268294 | -0.49425078  |
| Trappc5   | 66682  | -0.492364075 |
| Ergic1    | 67458  | -0.491686719 |
| Mtmr3     | 74302  | -0.488598002 |
| Tlcd1     | 68385  | -0.484371728 |
| Cebpg     | 12611  | -0.48043752  |
| Coq5      | 52064  | -0.479649295 |
| Zfr       | 22763  | -0.475775885 |
| Atf1      | 11908  | -0.471664415 |
| Pnpla8    | 67452  | -0.458331611 |
| Arfrp1    | 76688  | -0.457325048 |
| Ppm1d     | 53892  | -0.454209448 |

|               |        |              |
|---------------|--------|--------------|
| Erbp2ip       | 59079  | -0.452045534 |
| Gpr107        | 277463 | -0.451834744 |
| 2310061C15Rik | 66531  | -0.448376224 |
| Oxct1         | 67041  | -0.446844029 |
| Trak1         | 67095  | -0.444178748 |
| Dnajc8        | 68598  | -0.442959482 |
| Dpp8          | 74388  | -0.440296782 |
| Hsph1         | 15505  | -0.419163398 |
| Ubap1         | 67123  | -0.415337329 |
| Nars2         | 244141 | -0.415100427 |
| Atp6v1g1      | 66290  | -0.413137559 |
| Zmat2         | 66492  | -0.410789101 |
| H3f3a         | 15078  | -0.403354298 |
| Usp3          | 235441 | -0.40206909  |
| 6230416J20Rik | 230376 | -0.400353791 |
| Kctd5         | 69259  | -0.399700393 |
| 2310035C23Rik | 227446 | -0.393604976 |
| Txlna         | 109658 | -0.376906825 |
| Slc22a5       | 20520  | -0.373913215 |
| Hexb          | 15212  | -0.373611894 |
| Mllt3         | 70122  | -0.372129742 |
| Dst           | 13518  | -0.370541775 |
| Tmem183a      | 57439  | -0.362906052 |
| Epm2aip1      | 77781  | -0.341680175 |
| Srxn1         | 76650  | -0.340577864 |
| Zfp364        | 67845  | -0.33999152  |
| Dync1i2       | 13427  | -0.337878823 |
| Jarid1b       | 75605  | -0.333819321 |
| Nfib          | 18028  | -0.333732698 |
| Mgrn1         | 17237  | -0.331044573 |
| Agpat3        | 28169  | -0.320641342 |
| Dnaja1        | 15502  | -0.320619123 |
| Peli1         | 67245  | -0.320243574 |
| Ppp6c         | 67857  | -0.317993275 |
| Itm2b         | 16432  | -0.316772915 |
| Tpm3          | 59069  | -0.313943831 |
| Tmem77        | 67171  | -0.30642695  |
| Usp47         | 74996  | -0.306068651 |
| Zfp292        | 30046  | -0.303888642 |
| Srp9          | 27058  | -0.297851402 |
| Sppl3         | 74585  | -0.297049154 |
| Sdha          | 66945  | -0.290770417 |
| Stt3b         | 68292  | -0.290268423 |
| Gadd45gip1    | 102060 | -0.290197142 |

|               |        |              |
|---------------|--------|--------------|
| 1300018I05Rik | 74157  | -0.289502688 |
| Phf21a        | 192285 | -0.284774085 |
| Tle3          | 21887  | -0.283227488 |
| Fgfr1op2      | 67529  | -0.282963194 |
| Txndc13       | 52837  | -0.280323711 |
| Rfk           | 54391  | -0.278885    |
| Trim35        | 66854  | -0.276011824 |
| Scamp2        | 24044  | -0.273236712 |
| Rras2         | 66922  | -0.272132078 |
| Dazap1        | 70248  | -0.270258013 |
| Det1          | 76375  | -0.261759722 |
| Ak3           | 56248  | -0.260784186 |
| Lrrc59        | 98238  | -0.255657971 |
| Ptp4a2        | 19244  | -0.253929955 |
| Riok2         | 67045  | -0.253741779 |
| Clip3         | 76686  | -0.247794581 |
| 0610037P05Rik | 66086  | -0.247350296 |
| Dlat          | 235339 | -0.245387823 |
| Macf1         | 11426  | -0.242255094 |
| Cpd           | 12874  | -0.242181246 |
| 2610030H06Rik | 67048  | -0.239355809 |
| Parp1         | 11545  | -0.237229344 |
| Vamp7         | 20955  | -0.233017137 |
| Msi2          | 76626  | -0.225664095 |
| Git2          | 26431  | -0.22518546  |
| Nudt1         | 17766  | -0.220353977 |
| Chmp4b        | 75608  | -0.219485664 |
| Zfp148        | 22661  | -0.215972204 |
| Nedd1         | 17997  | -0.214735981 |
| Sav1          | 64010  | -0.21304686  |
| Sfrs11        | 69207  | -0.211803228 |
| Gopc          | 94221  | -0.210821525 |
| Coq10b        | 67876  | -0.207375313 |
| Glud1         | 14661  | -0.205627316 |
| Ppp1cc        | 19047  | -0.202034508 |
| Tigd2         | 68140  | -0.197279584 |
| Slc35e1       | 270066 | -0.1947988   |
| Ppp2r2d       | 52432  | -0.19258633  |
| Med11         | 66172  | -0.192089667 |
| Rab12         | 19328  | -0.185371915 |
| Prpf39        | 328110 | -0.184182097 |
| Ikbkg         | 16151  | -0.177605073 |
| Rnf7          | 19823  | -0.173926313 |
| Zfp592        | 233410 | -0.173840703 |

|               |        |              |
|---------------|--------|--------------|
| Hnrpll        | 72692  | -0.170470954 |
| Dhx33         | 216877 | -0.169437395 |
| Lrrfip2       | 71268  | -0.168333617 |
| AU014645      | 433702 | -0.168244826 |
| Tfip11        | 54723  | -0.166888758 |
| Hspa4l        | 18415  | -0.165565849 |
| Ttc9c         | 70387  | -0.162781379 |
| Sept2         | 18000  | -0.161258855 |
| Ythdc1        | 231386 | -0.159720091 |
| Prps2         | 110639 | -0.159590549 |
| 1200003I07Rik | 66869  | -0.154007892 |
| 2500003M10Rik | 66511  | -0.149332405 |
| Ogfod1        | 270086 | -0.149052112 |
| Ap3s2         | 11778  | -0.142967841 |
| Me1           | 17436  | -0.141814795 |
| Hnrnpa3       | 229279 | -0.140193314 |
| Ghitm         | 66092  | -0.1396346   |
| Mtfr1         | 67472  | -0.136638227 |
| Txndc1        | 72736  | -0.13574954  |
| Magi1         | 14924  | -0.133753861 |
| Capza1        | 12340  | -0.132642207 |
| Sec16a        | 227648 | -0.130319426 |
| Ncoa3         | 17979  | -0.130166962 |
| Alg8          | 381903 | -0.126980571 |
| 3110050N22Rik | 67306  | -0.12644955  |
| Itfg2         | 101142 | -0.123521857 |
| Fermt2        | 218952 | -0.12227875  |
| Tbc1d15       | 66687  | -0.118937518 |
| Nkap          | 67050  | -0.116912    |
| Pnrc1         | 108767 | -0.116363734 |
| Gtf3c2        | 71752  | -0.114165339 |
| Yaf2          | 67057  | -0.113995658 |
| Vapa          | 30960  | -0.111511321 |
| Ptpn2         | 19255  | -0.11116128  |
| Ddx6          | 13209  | -0.109234368 |
| Rpl21         | 19933  | -0.108340671 |
| Slc7a1        | 11987  | -0.093067588 |
| Tmpo          | 21917  | -0.092819222 |
| Preli1        | 66494  | -0.091130085 |
| Kpna6         | 16650  | -0.087297534 |
| Pctk1         | 18555  | -0.085009538 |
| Lztr1         | 66863  | -0.079195661 |
| Zfx           | 22764  | -0.078802795 |
| Mrpl3         | 94062  | -0.077544104 |



|               |        |              |
|---------------|--------|--------------|
| Stch          | 110920 | -0.075665464 |
| Rab9          | 56382  | -0.072764275 |
| Ctbp2         | 13017  | -0.071017064 |
| Entpd5        | 12499  | -0.070603429 |
| Serinc3       | 26943  | -0.062883341 |
| Suds3         | 71954  | -0.06206834  |
| Smap1         | 98366  | -0.061962073 |
| Rapgef6       | 192786 | -0.061806094 |
| Sel1l         | 20338  | -0.061447219 |
| Arvcf         | 11877  | -0.061186241 |
| Zfp593        | 68040  | -0.057427995 |
| Mrpl49        | 18120  | -0.057072297 |
| Camsap1       | 227634 | -0.049590663 |
| Snrk          | 20623  | -0.047774632 |
| Stk38l        | 232533 | -0.046872224 |
| Rnf146        | 68031  | -0.046300422 |
| Tomm70a       | 28185  | -0.046164936 |
| Es2el         | 27886  | -0.045827513 |
| Rad23b        | 19359  | -0.039012386 |
| Ankmy2        | 217473 | -0.038994012 |
| Osbp19        | 100273 | -0.036976649 |
| Noc3l         | 57753  | -0.03669295  |
| Nicn1         | 66257  | -0.035162887 |
| Ufm1          | 67890  | -0.025856719 |
| Tmem167       | 66074  | -0.025445372 |
| Ttc33         | 67515  | -0.024906738 |
| Foxk2         | 68837  | -0.020823232 |
| Tceb1         | 67923  | -0.020449565 |
| Cs            | 12974  | -0.019805366 |
| Bnip3l        | 12177  | -0.01534481  |
| Hmgb1         | 15289  | -0.014770779 |
| Actr3         | 74117  | -0.009931341 |
| Ddx11         | 320209 | -0.008875412 |
| Dyrk1a        | 13548  | -0.000320089 |
| Zkscan6       | 52712  | -1.358687861 |
| Rpl7l1        | 66229  | -0.788972877 |
| Ctsb          | 13030  | -0.698275253 |
| 0610037L13Rik | 74098  | -0.650779378 |
| Sys1          | 66460  | -0.621633981 |
| Bxdc2         | 67832  | -0.582723185 |
| Rab11b        | 19326  | -0.581691057 |
| Klh20         | 226541 | -0.535018706 |
| Foxm1         | 14235  | -0.455343404 |
| Timm22        | 56322  | -0.451522701 |

|               |        |              |
|---------------|--------|--------------|
| 4930534B04Rik | 75216  | -0.418215146 |
| Elmo2         | 140579 | -0.40122708  |
| Ywhaq         | 22630  | -0.358775209 |
| Ddt           | 13202  | -0.349249684 |
| Calml4        | 75600  | -0.341833505 |
| Cdipt         | 52858  | -0.323938063 |
| Dck           | 13178  | -0.2910047   |
| Iqgap2        | 544963 | -0.29068514  |
| Rab21         | 216344 | -0.286802256 |
| Slc25a39      | 68066  | -0.244472023 |
| Cfl1          | 12631  | -0.238715111 |
| Rap1b         | 215449 | -0.230883914 |
| Arl15         | 218639 | -0.228926951 |
| Psm14         | 59029  | -0.219685596 |
| Litaf         | 56722  | -0.218353236 |
| Fbxo3         | 57443  | -0.216939716 |
| Rap1a         | 109905 | -0.214298964 |
| Stx6          | 58244  | -0.197049237 |
| Tpm4          | 326618 | -0.196460661 |
| 4921533L14Rik | 68187  | -0.196173148 |
| Dusp1         | 19252  | -0.185134153 |
| Zfp157        | 72154  | -0.180503289 |
| Bcl2l1        | 12048  | -0.179478928 |
| Taok1         | 216965 | -0.179133465 |
| Nupl1         | 71844  | -0.178726025 |
| Ddx3x         | 13205  | -0.157352677 |
| Mthfd2        | 17768  | -0.1569095   |
| Phka1         | 18679  | -0.150944369 |
| 3110003A17Rik | 73112  | -0.15050134  |
| Txndc12       | 66073  | -0.141437483 |
| Poldip2       | 67811  | -0.136415139 |
| AU019823      | 270156 | -0.119161881 |
| 0610010E21Rik | 68332  | -0.116625206 |
| Xiap          | 11798  | -0.114915956 |
| Zdhhc5        | 228136 | -0.113588126 |
| Hnrnpa2b1     | 53379  | -0.105966392 |
| Srd5a3        | 57357  | -0.105122493 |
| Pacs1         | 107975 | -0.101581365 |
| Atp6v0c       | 11984  | -0.100445575 |
| Vamp3         | 22319  | -0.098699412 |
| Mfge8         | 17304  | -0.08953237  |
| Fryl          | 72313  | -0.089369447 |
| Lsm14a        | 67070  | -0.084906859 |
| Chmp5         | 76959  | -0.07867532  |

|        |        |              |
|--------|--------|--------------|
| Ctnnb1 | 12387  | -0.073699561 |
| Zfp110 | 65020  | -0.065738684 |
| Tcf12  | 21406  | -0.064189312 |
| Dtl    | 76843  | -0.063128323 |
| Gys1   | 14936  | -0.059459021 |
| Spop   | 20747  | -0.051202742 |
| Wee1   | 22390  | -0.049772516 |
| Wdr37  | 207615 | -0.048927203 |
| Obfc2a | 109019 | -0.031102382 |
| Tada2l | 217031 | -0.019786423 |
| Epn2   | 13855  | -0.008190611 |
| Zfp655 | 72611  | -0.004747297 |
| Twf1   | 19230  | -0.00104591  |
