# Supplementary material
Source: PubMed Central journal article supplement (PMC4194112)
Supplement: embj0033-0878-sd35.pdf [file embj0033-0878-sd35.pdf]

**Supplementary Table S4. Oligos used in this study. Primers for polyA site cloning**

| <b>Primer name</b>     | <b>Primer sequence</b>          |
|------------------------|---------------------------------|
| <i>mRpl26-F1</i>       | CAGGCTAAAGCTGGACAAGG            |
| <i>mRpl26-R1</i>       | CCGTGCACGAGATGTCTCTA            |
| <i>mRpl26-R2</i>       | TTTCCAGACCCCAAAGACTG            |
| <i>mCCND1-D-PAS-F</i>  | GAAGATCTACCCTTGAGGGCCGCTGTAT    |
| <i>mCCND1-D-PAS-R</i>  | CCGCTCGAGAACACCCATTTGCGCCAGAC   |
| <i>mCCND1-P-PAS-F</i>  | GCTCTAGAAAGCCCTTCTGGAGTCAAGC    |
| <i>mCCND1-P-PAS-R</i>  | CGGGATCCCCTTCTCAAGACTTCCCCTG    |
| <i>mDicer1-D-PAS-F</i> | GCTCTAGATGAGGTGAAGGGAAGAACAT    |
| <i>mDicer1-D-PAS-R</i> | CGGGATCCTAAGGAACCCATCAAGTAAG    |
| <i>mDicer1-P-PAS-F</i> | GCTCTAGATTTAAAGGTGTTGGCCGGAG    |
| <i>mDicer1-P-PAS-R</i> | CGGGATCCAGCAGGACAGGTATAGTGTAAG  |
| <i>mSbno1-D-PAS-F</i>  | GAAGATCTTGCTCCCAAGTGTCCAGAAT    |
| <i>mSbno1-D-PAS-R</i>  | CCGCTCGAGGAGTTTACTACATGTGCAGA   |
| <i>mSbno1-P-PAS-F</i>  | GCTCTAGAGTACAAATGTGAATAGACAC    |
| <i>mSbno1-P-PAS-R</i>  | CGGGATCCCCCAGCTCTTTGAGAAGATT    |
| <i>mEtf1-D-PAS-F</i>   | GCTCTAGATAAGTTTGGAAATGATGCCA    |
| <i>mEtf1-D-PAS-R</i>   | CGGGATCCACATTGCCTTCTGACTTACA    |
| <i>mEtf1-P-PAS-F</i>   | GCTCTAGAAAAAGAATCCCAGTTTTTAC    |
| <i>mEtf1-P-PAS-R</i>   | CGGGATCCTAGGCTGAGATGACAGGGAG    |
| <i>mAhctf1-D-PAS-F</i> | AGTCTAGAAAATGGATTTGTCAAATG      |
| <i>mAhctf1-D-PAS-R</i> | ATGGATCCACATCTCTGCCC            |
| <i>mAhctf1-P-PAS-F</i> | AGTCTAGAGAGTGCAGTTCTTGTAGTG     |
| <i>mAhctf1-P-PAS-R</i> | ATGGATCCTCTTAACTGTAAAGAAAGG     |
| <i>mNcaph2-D-PAS-F</i> | AGTCTAGAAACTGCCAAGCCTC          |
| <i>mNcaph2-D-PAS-R</i> | ATGGATCCAGGCACTTGTTTTc          |
| <i>mNcaph2-P-PAS-F</i> | AGTCTAGAAGTAGTATATACCTGGAGGTCTT |
| <i>mNcaph2-P-PAS-R</i> | ATGGATCCTATACCTATTGCCTAGG       |
| <i>mDicer1-P-PAS-F</i> | GCTCTAGAGCACAAGGATGGTTCCGGGCT   |
| <i>mDicer1-P-PAS-R</i> | CGGGATCCGGATTAAAGCACTCCTGTGA    |
| <i>mDicer1-D-PAS-F</i> | GCTCTAGAAGTTACCTTTAGCTTTTCCG    |
| <i>mDicer1-D-PAS-R</i> | CGGGATCCAACGAGCTTGCTACTGAAT     |

|                       |                              |
|-----------------------|------------------------------|
| <i>mSbno1-P-PAS-F</i> | GCTCTAGAGCTTGCACAGGTTGCACTAT |
| <i>mSbno1-P-PAS-R</i> | CGGGATCCGGCTACCTGGAAGGCTAAGG |
| <i>mSbno1-D-PAS-F</i> | GCTCTAGAAAGTACTCTATGTATTTAGG |
| <i>mSbno1-D-PAS-R</i> | CGGGATCCACGTCAACCCTTGCCAAGGA |

### Primers for mouse ESC and Lineage Markers

| Gene             | Forward                   | Reverse                  |
|------------------|---------------------------|--------------------------|
| <i>Oct4</i>      | CCTCCTCTGAGCCCTGTGC       | CTCCTTCTGCAGGGCTTTTCAT   |
| <i>Lefty1</i>    | TGCCCTTATCGATTCTAGGC      | AGCTGCTGCCAGAAGTTCAC     |
| <i>Lefty2</i>    | CACAAGTTGGTCCGTTTCG       | GGTACCTCGGGGTCACAAT      |
| <i>Eomes</i>     | ACCCGACCTTCCCTGCTATG      | ACCCGACCTTCCCTGCTATG     |
| <i>Sox17</i>     | GGTCTGAAGTGCGGTTGG        | TGTCTTCCCTGTCTTGGTTGA    |
| <i>Sox1</i>      | GAGGCCAGTCTGGTGTGAG       | GTGACATCTGCCCCCATC       |
| <i>Fgf5</i>      | GAGACACAGCAAATATTTCCAAA   | GTTTCCAGTGGAGCCCTTC      |
| <i>Brachyury</i> | CTGGGAGCTCAGTTCTTTTCA     | GAGGACGTGGCAGCTGAGA      |
| <i>Gata3</i>     | TTATCAAGCCCAAGCGAAG       | TGGTGGTGGTCTGACAGTTC     |
| <i>Kdr</i>       | GCACCACATCCAGTGGTACTGGCAG | CCCTGGAAATCCTCCACGTGTCTC |
| <i>FoxA1</i>     | GAACTCCATCCGCCACTCGCTG    | GCGCAAGTAGCAGCCGTTCTCG   |
| <i>Col5a2</i>    | GGAGAAGCAGGACCAGAGGGTCC   | CCAAGAGCAGCAGTAAGATGCC   |
| <i>Gcm1</i>      | TACGGATGAAGGGGAGACCAGCAG  | CTTCCCTGACTCGGGATTTCAGC  |

### Primers for DRS-Sequencing Validation/ Gene Expression Analysis

| Gene          | Forward                   | Reverse                   |
|---------------|---------------------------|---------------------------|
| <i>Atp5a1</i> | GGTTATCTTGACAAACTGGAGCCAG | CCCATCAGACCTGATATTGCCCAAG |
| <i>Chmp4B</i> | GGAGAAGAGTTCGACGAGGATGAGC | GTCCAACCTCCTTGTTCAGTTCCTC |
| <i>Ahctf1</i> | CTGTGAAGACAAGAGCAAGCA     | CCAAGGGAGAAACCAGCTTA      |
| <i>Cdca3</i>  | CAGCGCACTCCTATTCAGGT      | AGACCGTTCAGCTGTTCTGC      |
| <i>Ncaph2</i> | GGGCGAGTATCTGGAGGAG       | CAGTGCTGCCTCAATGAAGT      |
| <i>Mkrn1</i>  | GTTTATGGAGACCGCTGCAGATACG | CATTTAGCAAGTGATCCAACAACAG |
| <i>Ide</i>    | CTTGTCCGAAGCGCCACCCTTG    | CAGTGGCAGGCCACGCTTGAA     |
| <i>Sbno1</i>  | CCTTGAGGCTGCCTGTGCGC      | GGGAACTCCACAGTAAGGAC      |

|                           |                                  |                                    |
|---------------------------|----------------------------------|------------------------------------|
|                           |                                  | AAGG                               |
| <i>Wdr18</i>              | TTCATTGGACCAGACTGTGAA            | GCCCATGTCAAACAAGACAG               |
| <i>Bclaf1</i>             | CCAAGGAGATGGGATTGTTGAA<br>GATG   | GTAAGTGTCAAGTTCTGCTCCC<br>TGTTG    |
| <i>Ncl</i>                | CATGGTGAAGCTCGCAAAG              | TCACTATCCTCTTCCACCTCCTT            |
| <i>Hypk</i>               | CAGCAGAAAGGAGCTTGAGGGA<br>ACA    | CAGTCAGTCAGTCAGTCCAGAA<br>TGTCTAAA |
| <i>6720456B0<br/>7Rik</i> | GTGGAGGCAGTCCTGGCTGAGA<br>C      | GGGAAGCATGAGAGCTACTGAT<br>ACC      |
| <i>Ino80e</i>             | CCAGAGTAGCCACCCAGTGCC            | GTCAGTGGCCGAAGCATGGC               |
| <i>Nfyb</i>               | TCTGTTTGCCATGTCCACTC             | GAGACTGCTCCCCCGATAC                |
| <i>2410015M2<br/>0Rik</i> | GGAGTACCTCAAGGAACACAGC<br>AAG    | CCACTGGGATGTCTCTGCCATC             |
| <i>Rcc2</i>               | GTCTCGGGAACCCAGACAGAT            | TAAACCAGGCACCTTCAACC               |
| <i>Rbx1</i>               | GGCGGCGGCGATGGATGTG<br>G         | CAGAGGGCCACTGCATTCCA<br>C          |
| <i>Etf1</i>               | GGATTTGGTGGAAATTGGAGG<br>TATCTTG | CGGTTGCCGGACCCATGTC<br>G           |

|                           | <b>eUTR</b>                                                  |                                                           |
|---------------------------|--------------------------------------------------------------|-----------------------------------------------------------|
| <b>Gene</b>               | <b>Forward</b>                                               | <b>Reverse</b>                                            |
| <i>Atp5a1</i>             | GGCTCAGGTGTGTACCAGGATT<br>TG                                 | GCCTAGGCTAGCCATTGCTGAG<br>GTC                             |
| <i>Chmp4B</i>             | CACTGAGTTGCTGGGCTGCG                                         | GTCAGCTGCAGGGCTACATTT<br>C                                |
| <i>Ahctf1</i>             | TCCTCTTTTCCGACATCTGC                                         | ACTGGTAACTGCCACAGAACC<br>TCAGAAGTGGCAGGAGAGAGA<br>T       |
| <i>Cdca3</i>              | CAACTCTGGTACTTGGACATCG                                       | AGGCAGCTAGATAACCTGCTTG<br>AGGTGAGGGTAGAGGAACAGG<br>CC     |
| <i>Ncaph2</i>             | AGTTTCACCTCCTGAGATCCTG                                       | CAACAGAATCTGATGAGCGAGA<br>GC                              |
| <i>Mkrn1</i>              | GCGTGGCGCGGGCACTGGTC                                         | GCATCCACTGGGCAAATGTGC<br>CTCAGGAGACTGGGGACTTAG<br>A       |
| <i>Ide</i>                | CCCAGTGCTAGAAACGCAGACT<br>G                                  | GCTACAGGATAACCTTCCTCTA<br>CATGA                           |
| <i>Sbno1</i>              | GGCAGAGACTTGATGGAGCGC                                        | CAATGGGGTACCATTCCCTTG<br>GGTACTTCTTTATACTGATTGTT<br>CACAC |
| <i>Wdr18</i>              | GAGACCATCTGCCTGTACTIONC<br>GGTCTTAGATAACCAGCTACCTA<br>CGAGAG | GACAGGAACACTGACTGGAGA<br>GCC                              |
| <i>Bclaf1</i>             | GTGGGGAACAGCTTCATCAT                                         | CTTCTTGTGAGGGACTGTGGAG<br>AGC                             |
| <i>Hypk</i>               | CTTCAGTTTCATCTCAGATCAA<br>TGC                                | TGGCTATTTGGAGATTAATAG                                     |
| <i>6720456B0<br/>7Rik</i> | GGCTGGAGAGGGTCTCCTTGTT<br>G                                  |                                                           |
| <i>Ino80e</i>             | CACTGGCAGGAGACTCCCACGT<br>G                                  |                                                           |
| <i>Nfyb</i>               | TGTGCATTTTCTACAGAAAGGTT                                      |                                                           |

|                       |                                 |                                  |
|-----------------------|---------------------------------|----------------------------------|
|                       | ATTA                            | CATC                             |
| <i>2410015M2 ORik</i> | GATGTAGAGCCTTTGCTTTATGG<br>GC   | GCTCCAAACATTACATCTGGAA<br>CATAG  |
| <i>Rcc2</i>           | CACGGGAAGCTCTAGGACAG            | TAAACCAGGCACCTTCAACC             |
| <i>Rbx1</i>           | GTGGAGAGTGATCTGAGAAG<br>GAGCCAG | CAGGTTCCCTCGTGACCTTGT<br>GAAGATG |
| <i>Etf1</i>           | GTCAGACTGAGTGCCAACAC<br>ACTGG   | AACGCTAATGGCACAGAGGG<br>CTC      |

### Primers for 3'UTR cloning

| Gene          | Primer       | Sequence                                           |
|---------------|--------------|----------------------------------------------------|
| <i>Ahctf1</i> | Forward      | ATCGACTAGTATTTTTAGCCCAAGATTTTAACACGCACC            |
|               | Reverse-cUTR | GAACACGCGTACTTTACAGTAGTTTATTTAACCTCCCAATGAT<br>AA  |
|               | Reverse-eUTR | GAACACGCGTCTTGTGAGTTTTTTTTATTGTGCTACTTGTACC<br>A   |
| <i>Ccnd1</i>  | Forward      | atcgACTAGTGGGCCACCGGGCAGGCGGG                      |
|               | Reverse-cUTR | gtagACGCGT AACCAACAAAGAGAACAACAACTTCTCTTCTGG       |
|               | Reverse-eUTR | gtagACGCGTCTGGACCATGCTGGTCACATGT                   |
| <i>Dicer1</i> | Forward      | atcgACTAGTAGCTCCGGACTCACAGGCGG                     |
|               | Reverse-cUTR | gtagACGCGTACACATATTACATGTTTTATTCTGTTATCTATCTC      |
|               | Reverse-eUTR | gtagACGCGGAACAGACAATAACTTTATTGACTACAATTATT         |
| <i>Etf1</i>   | Forward      | atcgACTAGTGTAGTCGACATGGGTCCGGCAAC                  |
|               | Reverse-cUTR | gtagACGCGCAATATTTACATATATTTCTTCTTGTGC              |
|               | Reverse-eUTR | gtagACGCGCTTAAATATGGTTTAATACTCTTCTCCATTTCTGTA<br>C |
| <i>Ino80e</i> | Forward      | atcgACTAGTAGTGTGGGGCAGCCCTGACCCC                   |
|               | Reverse-cUTR | GAACACGCGTGAAAGAGCCAACTCTTTAATACAGAGCC             |
|               | Reverse-eUTR | GAACACGCGTAAAGAAGAAGACACTAAATCCGGAATTTAATG<br>AGGT |
| <i>Ncaph2</i> | Forward      | atcgACTAGTGTGGACAGCACTGAGGCAGGG                    |
|               | Reverse-cUTR | GAACACGCGTAACACTTTATTAGGCTAGGCCAGCC                |
|               | Reverse-eUTR | GAACACGCGTCTATAAAGAACAATTTATTGTAAATAGACACA<br>TG   |
| <i>Ncl</i>    | Forward      | atcgACTAGTTTCTTCCATCCCATTCTTCCCTCTTC               |
|               | Reverse-cUTR | GAACACGCGTCATCCTTGATAGATCACTGAAAAATTC              |

|              |              |                                                |
|--------------|--------------|------------------------------------------------|
|              | Reverse-eUTR | GAACACGCGTAACAGAGTTTAGGATCTTTACTGTC            |
| <i>Nfyb</i>  | Forward      | atcgACTAGTTCGGAAGGACGGACGGAACC                 |
|              | Reverse-cUTR | gtagACGCGTATGAACTCTACCCTTATATTTTATTAAAGGGTAAAC |
|              | Reverse-eUTR | gtagACGCGTTTACGATGTACACAAGATTCAATGAAGGGC       |
| <i>Rcc2</i>  | Forward      | atcgACTAGTGCAGGCCGGCCCTCCCCTCG                 |
|              | Reverse-cUTR | gtagACGCGTATCTCGTAGAAAGGCAGGCTGGC              |
|              | Reverse-eUTR | gtagACGCGTCGCAGAGTAAACAATGACGCCG               |
| <i>Wdr18</i> | Forward      | atcgACTAGTGACGTGCTGGGCCACTGCCAC                |
|              | Reverse-cUTR | gtagACGCGTAGAATTGTCCATCCTTTAGTCCATCC           |
|              | Reverse-eUTR | gtagACGCGTACTTTGAGCTGGTTTTTAATGAGATGGC         |

### siRNAs

| siRNA name | Gene Name     | Company             | Catalog No./sequence                   |
|------------|---------------|---------------------|----------------------------------------|
| Control    | FF luciferase | Dharmacon/ThermoSci | sequence:<br>CGTACGCGGAATACTTCGA       |
| Fip1-2     | Fip1L1        | Dharmacon/ThermoSci | D-063984-02                            |
| Fip1-3     | Fip1L1        | Dharmacon/ThermoSci | D-063984-03                            |
| Ncaph2-2   | Ncaph2        | Invitrogen          | MSS225245                              |
| Ncaph2-3   | Ncaph2        | Invitrogen          | MSS284938                              |
| Ncl-1      | Ncl           | Invitrogen          | MSS206961                              |
| Ncl-2      | Ncl           | Invitrogen          | MSS275939                              |
| Rcc2-1     | Rcc2          | Qiagen              | SI00823039                             |
| Rcc2-2     | Rcc2          | Qiagen              | SI00823046                             |
| Ahctf1-2   | Ahctf1        | Qiagen              | SI01307138                             |
| Ahctf1-4   | Ahctf1        | Qiagen              | SI01307152                             |
| Rbx1-2     | Rbx1          | Dharmacon/ThermoSci | D-041892-02                            |
| Rbx1-4     | Rbx1          | Dharmacon/ThermoSci | D-041892-03                            |
| Wwp2-1     | Wwp2          | Ambion              | AM16708                                |
| Wwp2-4     | Wwp2          | Qiagen              | SI02743797                             |
| Etf1 (1-4) | Etf1          | Qiagen              | SI00996359<br>SI00996366<br>SI00996373 |

|                 |        |        |                                                      |
|-----------------|--------|--------|------------------------------------------------------|
|                 |        |        | SI00996380                                           |
| CPSF30<br>(1-4) | CPSF4  | Qiagen | SI00958671<br>SI00958678<br>SI00958685<br>SI00958692 |
| CFIm25<br>(1-4) | Nudt21 | Qiagen | SI00958720<br>SI04414732<br>SI04414739<br>SI04414746 |
